# Supplementary material
Source: publisher figshare collection journal article supplement (https://tandf.figshare.com/articles/dataset/_/7886456)
Supplement: Supplementary file 1 [file 1 › taje_a_1572032_sm2126.xlsx]

## Sheet: Sources of data
B. L. Dickson (2019). Which water formed Australian sediment-hosted precious and potch opal?
Australian Journal of Earth Sciences (2019) 66, https://doi.org/10.1080/08120099.2019.1572032
No	Study	Area(s)	Analytical method	Samples
1	McOrist & Smallwood (1997)	L, A,M,CP	NAA	ind
2	Gallacher (2001)	Hebel (60km N of LR)	XRF, XRD, INAA, LA-ICP-MS	sed, ind
3	Dowell (2002)	LR, LR-C	LA-ICMS, 18O	zoned
4	Liddicoat (2003)	LR, LR-C	XRF, LA-ICPMS	zoned, sed
5	Fink (2005)	LR wide area incl -C	LA-ICPMS	ind, zoned
6	Brown (2005)	A, CP, LR	TGA, SEM, LA-ICPMS	zoned
7	Gaillou et al (2008)	LR, M,CP,A,Q + foreign	ICPMS	ind
8	Pewkliang et al (2004, 2008)	A, CP	XRF	ind
9	Hughes (2011)	A	ICPMS	sed
10	Dutkiewisc et al (2013)	A,M,CP,LR,Q	LA-ICPMS	zoned, sed

## Sheet: Opal samples
Source No	Area	type	Description	N(samples)	N(analyses)	(La/Yb)N	Ce/Ce*	Eu/Eu*	V	Ba
									mg/kg	mg/kg
1	L	P	white	3	1	1.03351				93
1	C M	P	white	18	1	1.47644				310
1	L	P	black	9	1	1.16885	0.917796		6.2	140
1	M	P	black	6	1	1.38416	0.700106		0.5	240
1	L	P	grey	6	1		0.977419	0.9774	6.7	230
2	H	P	amber	3	6	1.37036	1.38408	0.153753	4.38	30.37
2	H	P	grey	7	14	1.23825	1.30961	0.145246	0.94	41.82
2	H	P	black	7	30	0.810085	1.07172	0.103647	10.65	49.28
2	H	G	gem	8	32	0.858711	1.2493	0.199793	0.5	33.82
2	H	host	upper clay	30	30				226	135.06
2	H	host	av, lower clay	20	20				171	149.32
2	H	host	av. sandstone	35	35				75	124
3	L	host	argillite	7	7	0.410045	0.877966	-0.00296319	190.11	130.98
3	L	host	arenite	6	6	0.504691	0.95926	-0.0438484	180.94	125.92
3	L	P	grey	4	4	1.015	1.474	0.151	1.59	100.31
3	L	P	black	2	2	1.074	1.281	0.147	7.633	105.71
3	L	P	Gem	4	4	0.866589	1.03728	0.337246	0.538	71.61
3	L	P	zoned	1	5	0.7986	1.4034	0.183	1.27006	134.25
3	l		silcrete	2	2
4	L	host	clay		10	0.565815	0.958635	0.0823534	98.656	128.674
4	L	P	green		6	1.08011	1.165	0.174634	1.914	37.74
4	L	P	purple		6	0.914082	1.02082	0.184424	1.22967	119.843
4	L	P	black	9	13	0.925711	1.1664	0.189749	6.31292	53.0192
4	L	P	white		5	0.775272	0.905705	0.190742	19.2902	136.806
4	L	P	red		3	1.09511	1.14927	0.285499	1.76367	40.6667
4	L	P	clear		1	0.912553	1.04583	0.180936	3.25	279.13
4	L	P	grey		2	0.538599	1.00794	0.0816815	0.4045	118.125
5	L	P	dark greys	8	8				12	225
5	L	P	light greys	29	29				0	170
6	L	P	potch	11	11	0.968703	1.06244	0.215697		153.964
6	L	P	black	2	2	1.09837	1.07816	0.170901		185
6	L	G	Gem	3	3	0.898106	1.22399	0.341461		77.525
6	C	P	potch	3	3	0.980258	1.40777	0.157811		109.067
6	A	G	gem	1	1	0.23	2.27	-0.28		102
6	A	P	potch	4	4	0.76	0.78	0.23		258
7	L	G	grey	2	2	0.671265	1.04009	0.188449	0.45	134.84
7	L	P	grey	1	1	0.796662	0.975109	0.223274	0.73	182.66
7	M	P	grey	1	1	2.37099	0.775234	-0.0473289	0.08	286.9
7	C	G	white	2	2	0.795205	0.974532	0.0266724	0.185	210.45
7	A	P	white	1	1	0.249589	1.03484	0.141046	0.34	143.75
8	C	P	opal fossil	2	2				36.3	226.5
8	A	P	opal fossil	3	3				56.6	247
9	A	host	Bulldog Shale	9	9	1.41713	0.947084	-0.0273509	68.7	185
9	A	GAB	Cadna-owie	21	21	1.24725	0.935447	-0.0356238	94.9	392
9	A	GAB	Algebuckina	17	17	0.986766	0.985518	-0.0114607	62.6	381
10	C	host	Bulldog Shale	2	2	0.922171	0.836942	0.0443385	152.5	89.55
10	L	host	Finch	3	3	0.490934	0.985473	0.0689507	89.3333	181
10	M	host	Mintabie	2	2	1.35575	0.994264	0.227598	39	1217.5
10	C	P	potch	2	8					185
10	C	G	gem	1	3					156.5
10	M	P	potch	1	30					577.467
10	L	P	grey	1	32					35.775
10	L	G	Gem	1	10					29.32
	KEY
	Area L=Lightning Ridge, H= Hebel (60km N of L), both in NSW, A=Andamooka, M=Mintabie, C=Coober Pedy, all in South Australia.
	Type - P= potch, G=gem, host=host rock, GAB=aquifer rock, Great Artesian Basin
	N(samples) - no of samples used in study
	N(analyses) -no of analyses made in study; Note if N(samples) >1 and N(analyses)=1, data is average of N(samples)
	Source No - see column 1 "Sources of data"

## Sheet: Opal results
Study	Location	Type	Description	Ident	Ti	Al	Fe	Ca	K	Ba	Cu	Ni	Pb	Sr	Th	V	Zn	Zr	As	La	Ce	Pr	Nd	Sm	Eu	Gd	Tb	Dy	Ho	Er	Tm	Yb	Lu	Y	(La/Yb)N	Ce/Ce*	Eu/Eu*
					mg/kg	mg/kg	mg/kg	mg/kg	mg/kg	mg/kg	mg/kg	mg/kg	mg/kg	mg/kg	mg/kg	mg/kg	mg/kg	mg/kg	mg/kg	mg/kg	mg/kg	mg/kg	mg/kg	mg/kg	mg/kg	mg/kg	mg/kg	mg/kg	mg/kg	mg/kg	mg/kg	mg/kg	mg/kg	mg/kg
8	W		opal wood		599.508	11114.3	699.433	1429.4	830.147	239	2		2.2	47.2	1.3	7	2	199		1	6		0											1.5
8	W		opal shell		3597.05	15348.3	3497.16	12149.9	3320.59	214	5		6.4	134.4	3.6	52	3	206		3	13		3											5.2
8	C		fossil		419.656	4022.31	6504.73	287953	664.118	204	8		0.4	720.7	0.7	28	67	16.4		4	17		0											7
8	A		opal fossil		719.41	11220.1	2308.13	714.701	747.132	259	4		2.6	16.5	1	28	15	232.4		0	6		0											2.4
8	A		opal fossil		3177.39	23340	4056.71	1072.05	1577.28	236	8		1.6	25.1	1.3	61	114	267.2		2	9		2											3.8
8	A		opal fossil		959.213	10690.9	1538.75	428.821	581.103	248	6		2.6	14.7	1.9	20	16	211.7		0	7		1											2.1
5	L	P	dark grey	408	1678.56		2028.36	2144.08	2988.54	237	1044	137.5	226	108.5	4	15	164	355	72	37.5	100.5		3	8										37.5
5	L	P	dark grey	20020	1498.71		3637.05	2572.9	2158.39	316	1666.5	74.5	355	119	4	13.5	145	425.5	81.5	4	51.5		0	9.5										20.5
5	L	P	dark grey	407	479.588		2378.07	2572.9	2407.44	204.5	782.5	137	139	103.5	4	1.5	108	166.5	32	0	13.5		0	2										6.5
5	L	P	dark grey	20018	719.381		1958.41	1786.74	1328.24	223	286	39.5	43	92.5	6	9.5	45.5	366.5	32	0	46		10	4										12
5	L	P	dark grey	409	239.794		1538.75	2144.08	1992.36	225.5	171.5	40.5	29	104.5	4	1	23	143	13.5	0	8.5		0	0										4
5	L	P	dark grey	618	1139.02		2028.36	3216.12	2905.53	315.5	311.5	59.5	54	127	9.5	12	19	209	31	12.5	74		24.5	3.5										24
5	L	P	dark grey	404	839.278		699.433	500.286	581.106	55.5	120.5	23	20	51	5.5	12.5	20	159	15.5	0	26.5		4	0										8.5
5	L	P	dark grey	30014	419.639		629.49	786.164	996.181	82	37	23	13	60.5	4.5	6.5	20	319.5	17.5	3	37.5		16	3										12.5
5	L	P	light grey	402	179.845		1119.09	2215.55	1660.3	150.5	88.5	18	13	89.5	4.5	0	25	135.5	5.5	0	18.5		2	0										6
5	L	P	light grey	392	479.588		839.32	1286.45	1494.27	96	35	18	12.5	66	4	0.5	16	195	4.5	0	12.5		1.5	0										5
5	L	P	light grey	401	299.742		1119.09	1429.39	1328.24	170	56.5	18	12.5	74	4	2.5	2	195	6	0	17		1	4										4.5
5	L	P	light grey	613	179.845		1608.7	3502	1743.32	206.5	46	18	11.5	105	4	0	6.5	100.5	3.5	0	8.5		2.5	0										5.5
5	L	P	light grey	406	599.484		1328.92	2644.37	2739.5	185.5	96.5	18	18	91	4.5	2.5	9.5	180.5	7	0	23.5		4	5										10
5	L	P	light grey	615	179.845		839.32	1143.51	830.151	259	7.5	18	8	70.5	4	0	1.5	179.5	2	0	1.5		0	0										2.5
5	L	P	light grey	20019	359.691		1398.87	2001.14	1992.36	195.5	61.5	18	13.5	91.5	6	1.5	8	312	12	2.5	35		9	1.5										10
5	L	P	light grey	20017	59.9484		1258.98	1786.74	1245.23	248.5	11.5	18	6.5	86	5	0	0	210.5	3	0	0		3.5	0										1.5
5	L	P	light grey	399	179.845		979.206	1357.92	1245.23	89.5	22	18	9.5	64	4	0	0	127.5	3	0	2		0.5	0										3.5
5	L	P	light grey	394	179.845		1119.09	2215.55	1245.23	112	13.5	18	8.5	73	4	1.5	0	156	5	0	7.5		0	4.5										3.5
5	L	P	light grey	403	299.742		839.32	2072.61	2241.41	170.5	7	18	9	92	4	0	2.5	125.5	5	0	10		0	2										5
5	L	P	light grey	397	479.588		1189.04	2144.08	2158.39	139.5	55	18	12.5	81.5	4	2.5	2.5	184	4	0	15.5		0	2.5										6.5
5	L	P	light grey	396	239.794		1119.09	1858.2	1660.3	115.5	16	18	7	78.5	4	0.5	0	151	4	0	9.5		0	2.5										3.5
5	L	P	light grey	20022	299.742		1328.92	1929.67	1826.33	200	43	18	11.5	90.5	5.5	0.5	5	326	7.5	0	27.5		11	3.5										8
5	L	P	light grey	20021	119.897		1258.98	1858.2	1245.23	257.5	36	18	9.5	86	4	0	2	242.5	4	0	2		0	0										3
5	L	P	light grey	400	299.742		909.263	1286.45	1494.27	86	35	18	9.5	64	4	0.5	1	137.5	2	0	7.5		1.5	1.5										3.5
5	L	P	light grey	614	239.794		1538.75	3716.41	747.136	238	26.5	18.5	9.5	115	4	0	1.5	80	4.5	0	4.5		0	1.5										4.5
5	L	P	light grey	616	419.639		1468.81	2644.37	1909.35	249.5	24	18	14	116	4	6	0.5	131	6.5	0	19.5		3	0										4.5
5	L	P	light grey	398	119.897		979.206	1286.45	1162.21	82.5	19	18	8	64.5	4	0	1.5	133	3	0	5.5		0	1.5										2
5	L	P	light grey	393	239.794		1189.04	2072.61	1411.26	116.5	15.5	18	7	78	4	0.5	0	168	2.5	0	5.5		0.5	0										3.5
5	L	P	light grey	617	119.897		1049.15	2215.55	1826.33	143.5	6	18	5	90.5	5	0	0	176	4.5	0	2		0	0										3.5
5	L	P	light grey	612	17.9845		1049.15	2572.9	996.181	240	2.5	18	4	81	5	0	7	77	1	0	2.5		0	4										1.5
5	L	P	light grey	395	119.897		699.433	1643.8	1411.26	202.5	6.5	18	6.5	88	4.5	0	0	90	4	0	2.5		1	0										3
5	L	P	light grey	405	17.9845		1049.15	2144.08	1162.21	238.5	0	18	4	84	5	0	0	94.5	1	0	0		0	0										1.5
5	L	P	light grey	737	59.9484		349.716	21.4408	24.9045	0	0	19	6	27	4	0	0	683	1		0													0
10	L	P	Blue	N36443				711		26.5								76.1								0.119
10	L	P	Green	N36443				631		28.4								76.7								0.0919
10	L	P	Medium grey	N36443				773		34.7								147								1.95
10	L	P	Orange-red	N36443				656		28.5								79.1								0.139
10	L	P	Green	N36443				623		26.4								82.6								0.193
10	L	P	Medium grey	N36443				752		37.8								180								3.36
10	L	P	Green	N36443				702		28.5								78.5								0.098
10	L	P	Blue	N36443				635		26.3								73.9								0.139
10	L	P	Blue	N36443				692		28.1								78.2								0.0867
10	L	P	Green	N36443				663		28								77.4								0.0909
10	L	P	Medium grey	N36443				716		29.8								80.7								0.142
10	L	P	Medium grey	N36443				759		31.7								87.4								0.187
10	L	P	Medium grey	N36443				694		30.8								96.5								0.337
10	L	P	Medium grey	N36443				804		41.7								244								4.32
10	L	P	Medium grey	N36443				704		33.4								163								3.29
10	L	P	Medium grey	N36443				701		34.5								164								3.32
10	L	P	Light grey	N36443				720		34.5								162								3.06
10	L	P	Medium grey	N3S443				733		38.7								202								4
10	L	P	Medium grey	N36443				722		38.5								186								3.62
10	L	P	Medium grey	N36443				822		42.5								291								5.09
10	L	P	Light grey	N36443				789		39.3								210								3.37
10	L	P	Medium grey	N36443				681		30.1								100								0.779
10	L	P	Medium grey	N36443				690		35								168								3.2
10	L	P	Light grey	N36443				729		35.1								156								3.23
10	L	P	Light grey	N36443				742		36.1								177								4.04
10	L	P	Light grey	N36443				779		34.8								169								3.47
10	L	P	Medium grey	N36443				663		31.6								132								2.5
10	L	P	Light grey	N36443				598		29.3								138								2.35
10	L	P	Light grey	N36443				761		39.1								218								4.12
10	L	P	Light grey	N36443				750		35.9								235								4.82
10	L	P	Light grey	N36443				733		33.6								152								3.34
10	L	P	Medium grey	N36443				693		31.5								116								1.89
10	L	P	Light grey	N36443				694		34.5								156								3.06
10	L	P	Light grey	N36443				757		39.3								188								3.58
10	L	P	Medium grey	N3S443				773		40.8								192								3.62
10	L	P	Light grey	N36443				773		40.6								244								4.42
10	L	P	Green	N36443				759		31.3								90								0.315
10	L	P	Light grey	N36443				776		38.4								196								3.77
10	L	P	Medium grey	N36443				799		38.5								181								4.02
10	L	P	Dark grey	N36443				688		32.8								119								2.06
10	L	P	Green	N36443				890		36.8								96.1								0.0829
10	L	P	Medium grey	N36443				819		44.3								276								4.77
4	L	P	black	op1-Blk1	642.29	4478.13	413.23	786.1	1046.27	42.49	30.33	12.83	11.28	26.75	9.49	5.04	33.94	222.78	25.64	16.38	43.97	4.95	19.18	4.26	1.114	3.31	0.456	3.08	0.574	1.73	0.251	1.75	0.254	14.05	0.690974	1.16425	0.144856
4	L	P	black	op1-Blk2	613.28	4373.52	392.6	683.23	954.52	39.48	29.7	9.98	10.28	25.84	9.03	5.1	27.5	207.79	20.74	14.53	37.91	4.42	17.18	3.42	0.98	2.99	0.42	2.65	0.51	1.516	0.209	1.51	0.216	12.3	0.710353	1.12722	0.159204
4	L	P	purple	op1-P1	60.52	3677.05	221.22	725.74	763.99	31.43	3.07	1.52	0.979	19.07	0.785	0.725	1.88	94.67	2.24	1.064	2.509	0.295	1.229	0.235	0.082	0.168	0.0207	0.177	0.0289	0.081	0.0095	0.096	0.0121	0.824	0.818194	1.02827	0.287138
4	L	P	purple	op1-P2	56.32	3817.08	239.96	737.49	823.11	32.3	2.68	1.53	0.84	19.93	0.696	0.668	1.34	94.68	1.76	0.829	2.258	0.258	0.839	0.188	0.0541	0.205	0.0269	0.12	0.0204	0.107	0.011	<0.080	0.015	0.682		1.24868	0.10946
4	L	P	green	op1-Grn1	55.59	3819.51	231.58	788.65	814.67	32.79	2.62	1.01	0.954	19.93	0.707	0.667	1.47	95.46	1.61	0.846	2.294	0.248	0.966	0.241	0.043	0.161	0.0266	0.15	0.0279	0.064	<0.0116	0.095	<0.0140	0.755	0.657404	1.18778	0.00913168
4	L	P	green	op1-Grn2	57.42	3911.58	219.91	728.78	802.23	32.09	2.67	1.1	0.767	20.15	0.703	0.751	1.46	95.52	1.86	11.79	16.45	1.89	7.34	1.58	0.257	1.14	0.185	2.06	0.386	1.68	0.254	1.66	0.286	0.796	1.24464	1.32429	0.151147
4	L	P	clear	op2-C1	582.12	10142.8	889.9	2286.6	4060.32	279.13	33.76	2.82	12.58	80.21	6.87	3.25	5.58	171.12	2.41	16.07	39.08	4.75	19.22	4.11	1.162	3.16	0.438	2.62	0.497	1.234	0.197	1.3	0.177	12.04	0.912553	1.04583	0.180936
4	L	P	purple	op2-P3	667.33	11354.5	846.23	2259.52	5259.46	292.51	49.4	3.24	14.42	81.44	8.56	3.83	6.41	185.7	3.53	19.96	48.91	5.87	23.68	5.18	1.371	3.72	0.515	3.28	0.6	1.455	0.212	1.4	0.207	14.59	1.05249	1.05723	0.166192
4	L	P	black	op3-Blk3	990.65	8904.3	1321.34	1586.58	1431.87	192.38	290.87	44.59	42.77	61.67	10.56	11.6	30.64	226.66	19.45	18.65	44.41	5.32	20.42	4.09	1.134	3.51	0.447	3.01	0.512	1.406	0.177	1.167	0.187	13.3	1.17976	1.06014	0.148988
4	L	P	white	op3-W1	461.08	7244.66	674.63	1435.51	979.4	143.22	18.12	3.76	15.53	55.04	4	4.63	4.25	187.64	2.5	8.46	19.55	2.065	7.69	1.44	0.445	1.393	0.158	1.04	0.195	0.56	0.0796	0.578	0.071	5.53	1.08051	1.10008	0.169031
4	L	P	grey	op3-Gy1	24.39	6083.79	555.9	1445.01	1359.56	120.4	1.06	0.78	0.828	44.04	0.492	0.418	0.99	136.56	0.5	0.959	2.158	0.222	0.962	0.187	0.049	0.166	0.0259	0.119	0.0371	0.068	<0.0089	<0.081	0.0172	0.739		1.03493	0.116969
4	L	P	white	op3-W2	44.2	5769.06	532.54	1351.25	888.3	108.99	4.15	0.89	1.203	42.03	0.563	0.503	1.6	120.46	0.48	0.839	1.947	0.198	0.849	0.124	0.06	0.14	0.0154	0.113	0.0235	0.072	0.0127	0.089	0.0144	0.694	0.695917	1.06392	0.326548
4	L	P	grey	op3-Gy2	25.32	6094.74	563.86	1523.57	1222.6	115.85	0.91	0.89	0.693	44.87	0.352	0.391	0.78	136.73	0.42	3.36	7.51	0.871	7.07	0.469	0.108	0.374	0.034	0.387	0.114	0.445	0.088	0.42	0.088	0.694	0.538599	0.98096	0.0463943
4	L	P	black	op4-Blk4	98.87	4630.49	384.05	336.26	1180.16	45.72	3.52	7.55	1.35	24.75	1.084	1.62	2.42	99.91	1.56	1.57	4.31	0.443	1.76	0.313	0.145	0.34	0.0431	0.197	0.058	0.136	0.0145	0.137	0.0221	1.4	0.845989	1.21117	0.317182
4	L	P	black	op4-Blk5	77.26	4738.17	346.28	361.49	1056.61	43.53	2.72	4.99	0.95	24.3	0.939	1.62	1.84	101.11	1.33	1.097	3.21	0.323	1.26	0.215	0.082	0.237	0.0333	0.14	0.0384	0.089	0.014	0.1	0.0216	1.05	0.809827	1.27882	0.229126
4	L	P	purple	op4-P4	79.07	4839.55	314.27	105	1042.34	41.65	3.23	3.98	1.28	24.09	1.04	1.6	1.7	101.01	1.45	7.07	11.33	2.6	13.11	1.92	0.48	1.59	0.284	1.48	0.323	0.98	0.165	0.95	0.19	1	1.15721	1.0017	0.37183
4	L	P	purple	op4-w3	385.95	8225.05	665.8	3389.23	1706.52	33.94	14.15	5.12	2.85	19.14	3.13	9.45	3.27	76.97	0.79	0.657	1.41	0.151	0.566	0.068	0.0304	0.088	0.0184	0.101	0.0165	0.048	0.0082	0.044	0.009	1.33	0.991639	1.04393	0.136009
4	L	P	green	op4-Grn3	44.5	4737.36	287.88		903.21	38.23	1.33	1.28	0.66	21.93	0.586	1.09	1.28	93.77	0.72	1.8	4.22	0.543	1.97	0.356	0.087	0.25	0.0413	0.215	0.0484	0.128	0.0226	0.134	0.0232	0.536	1.1023	1.04006	0.257212
4	L	P	blue	op4-Bl1	108	4524.82	309.49	363.96	1052.35	36.18	3.54	3.58	1.46	20.83	1.17	1.71	1.76	91.62	1.26	1.72	4.71	0.481	1.77	0.347	0.101	0.26	0.042	0.271	0.05	0.145	0.0201	0.122	0.019	1.5	1.04077	1.24776	0.198882
4	L	P	green	op5-Grn4	130.49	4451.38	364.3	168.15	1118.81	39.83	3.52	1.81	2.05	19.83	1.17	1.9	2.9	94.37	1.08	2	5.08	0.534	2.26	0.5	0.111	0.34	0.057	0.302	0.073	0.157	0.0233	0.189	0.0291	1.7	0.781185	1.11716	0.100605
4	L	P	red	op5-R1	79.99	4173.67	303.23	413.97	941.27	38.5	3.41	1.44	2.09	19.18	0.921	1.21	1.32	88.7	0.76	1.34	5.81	0.342	1.07	0.273	0.077	0.22	0.0312	0.56	0.082	0.358	0.059	0.41	0.063	1.19	1.18786	1.05674	0.201119
4	L	P	green	op5-Grn5	70.66	4151.11	370.62	427.47	1316.48	36.69	3.85	2.21	1.01	19.49	0.417	2.33	6.71	83.92	0.61	0.812	1.8	0.159	0.65	0.094	0.042	0.084	0.0138	0.108	0.0144	0.036	0.0104	0.032	0.0105	0.462	1.87323	1.09973	0.347251
4	L	P	red	op5-R2	68.2	4754.58	500.2	369.23	947.87	41.88	3.66	1.3	0.99	21.62	0.653	3.1	3.94	98.12	0.7	0.791	2.05	0.211	0.8	0.138	0.051	0.101	0.0149	0.1	0.0289	0.059	0.0086	0.063	0.0108	0.68	0.926876	1.18841	0.307362
4	L	P	red	op5-R3	53.77	4564.03	292.26	567.87	850.65	41.62	2.34	0.74	1.25	20.92	0.635	0.981	2.41	98.51	0.66	3.28	5.89	0.72	3.31	0.49	0.145	0.48	0.097	0.77	0.18	0.55	0.112	0.93	0.112	0.68	1.17061	1.20266	0.348014
4	L	P	black	op6-Blk6	593.87	5700	602.31	697.53	1475.28	41.86	52.81	14.97	10.74	25.65	9.81	7.04	18.32	169.18	28.08	17.41	50.29	5.41	20.25	4.03	1.15	2.65	0.48	2.74	0.49	1.33	0.194	1.21	0.169	11.91	1.06218	1.25615	0.216103
4	L	P	green	op6-Grn6	201.74	5432.09	526.71	835.69	1149.62	39.57	5.03	3.58	1.28	24.04	1.08	3.93	6.51	93.11	2.09	1.55	4.16	0.462	2.16	0.3	0.085	0.23	0.042	0.231	0.047	0.135	0.0155	0.116	0.0146	1.11	0.986415	1.08225	0.182461
4	L	P	black	op6-Blk7	626.21	6594.65	651.31	730.36	1014.42	41.56	66.07	15.08	13.22	28.43	11.86	9.17	12.92	180.18	23.82	19.34	51.83	5.81	23.92	4.69	1.3	3.28	0.54	3.04	0.55	1.36	0.201	1.24	0.168	12.41	1.15138	1.1369	0.191524
4	L	P	black	op6-Blk8	550.14	6031.74	675.25	1012.51	1479.87	48.33	37.46	11.93	10.33	30.41	9.56	6.47	18.45	187.4	19.97	16.52	45.01	5.05	20.52	4.03	1.12	3.12	0.47	2.74	0.53	1.4	0.201	1.24	0.166	12.1	0.983499	1.1538	0.172046
4	L	P	white	op7-W2	45	6658.31	682.11	1597.23	1667.05	155.89	1.91	1.321	0.355	51.39	0.191	0.575	4.5	84.2	0.13	0.394	0.965	0.0957	1.143	0.096	0.026	0.081	0.0125	0.061	0.0175	0.06	0.0071	<0.069	0.0089	0.511		0.66923	0.14251
4	L	P	white	op7-W3	16.81	6845.94	613.16	1734.35	1468.08	163.19	0.461	0.765	0.188	54.12	0.162	0.223	1.61	91.08	0.1	0.342	0.857	0.215	0.361	0.063	0.0224	0.068	0.0066	0.059	0.0135	0.042	0.0046	<0.042	<0.0058	0.408		1.13113	0.203824
4	L	P	purple	op7-P5	14.97	6746.95	610.08	1936.73	1293.44	161.78	0.417	1.086	0.473	54.82	0.085	0.19	3.06	93.36	0.08	0.285	0.586	0.0688	0.328	0.06	0.0194	0.062	0.009	0.042	0.0089	0.037	<0.0049	<0.049	<0.0085	0.312		0.897892	0.173111
4	L	P	purple	op7-P6	24.52	6751.93	652.39	1803.16	1592.41	159.39	1.63	1.271	0.249	53.87	0.0972	0.365	5.26	88.19	0.08	12.67	18.19	3.2	12.52	2.18	0.452	1.82	0.267	2.02	0.452	1.46	0.199	1.48	0.243	0.357	0.628433	0.891123	-0.00118818
4	L	P	black	op8-Blk9	2559.71	5512.66	667.96	654.03	1127.33	39.65	55.22	6.94	15.32	32.51	16.96	17.58	16.44	302.1	11.61	24.9	61.53	6.8	26.57	5.26	1.46	4.32	0.624	3.68	0.785	2.02	0.3	1.78	0.291	20.63	1.03268	1.11092	0.159007
4	L	P	black	op8-Blk10	1464.65	4753.29	451.74	598.38	1050.29	33.29	32.65	3.72	10.4	26.26	12.02	11	11.29	211.09	6.97	16.66	43.33	4.83	18.9	3.77	1.06	3.1	0.434	2.46	0.496	1.28	0.172	1.22	0.165	13.1	1.00809	1.14217	0.164346
4	L	P	blue	op9-Bl2	148.5	5496.56	775.63	1031.72	1427.22	43.57	23	1.84	2.14	27.21	0.999	3.31	15.08	110.13	1.52	1.208	3.42	0.355	1.4	0.153	0.059	0.248	0.0326	0.142	0.0471	0.11	0.0222	0.105	0.0203	0.982	0.849304	1.23292	0.13112
4	L	P	green	op9-Gen7	103.67	5299.39	452.48	1033.69	1033.47	45.01	8.93	1.79	1.6	27.45	0.94	2.73	13.52	110.12	1.98	1.029	3.12	0.348	1.23	0.213	0.058	0.181	0.0233	0.173	0.0303	0.109	<0.0091	0.098	0.016	0.883	0.775131	1.30425	0.143307
4	L	P	blue	op9-Bl3	61.29	4753.2	327.54	1033.29	987.37	41.21	2.75	0.83	1.2	26.43	0.771	0.808	2.68	105.47	1.09	0.798	1.81	0.239	0.805	0.15	0.0469	0.11	0.0256	0.103	0.0313	0.055	0.0125	0.088	<0.0085	0.651	0.669431	1.04105	0.234352
4	L	P	black	3	599.508	6615.64	419.66	1072.05	1162.21	69	12	2	6.4	32	3.7	6	4	142	3.8	8	18													6
4	L	P		MF1	4436.36	37735.6	2587.9	1286.46	4067.72	156	18	4	14.7	50	4.6	54	9	220	2.4	7	12													10
4	L	P		MF4	4736.11	54724.6	3637.05	1572.34	5561.98	146	18	4	10	48	4.3	63	12	176	1.3	10	14													11
3	L	G		Porc	38.2	6129.49		2429.35	2459.18	129.481	2.58929	6.93211	1.18158	60.1039	0.281762	0.558632	1.60676	62.6925	0.201666	0.520561	1.4025		0.479986	0.0940628	0.0374093	0.100143		0.0843135		0.0472104		0.0516571	0.00694642	0.515559	0.743922	1.27635	0.255823
3	L	G		BAR	40.0928	6165.37		2071.45	1777.37	109.842	0.80154	5.80688	0.870916	51.178	0.471686	0.422027	0.57857	41.1175	0.310294	0.766894	2.16994		0.784826	0.158598	0.0479934	0.140133		0.102834		0.0568303		0.0477478	0.00812193	0.602266	1.18568	1.29191	0.180537
3	L	G		pree	42.4769	3058.32		606.847	1166.59	45.1301			0.799445	15.0161	0.349977	0.402514	8.66788	83.9759	0.41316	0.607207	1.86978		0.568207	0.108748	0.0327433	0.0972241		0.0969038		0.0643119		0.0668869	0.0110996	0.59759	0.670164	1.45141	0.175726
3	L	G		Cute	59.3668	7422.86		2374.49	1208.22	2.01933	2.67864	4.2656	5.02428	77.0014	0.170744	0.770331	1.29966	0.0761127	0.635258	1.6859	0.312725		0.0941111	0.268827	0.221779	0.125046		0.130395		0.0166075		5.26089	0.809923	0.272413	0.023657	0.129456	0.736897
3	L	P	VL grey		90.1315	2946.53		593.414	1680.83	33.4203				14.8265	1.5285	0.843496	4.83279	96.3719	1.26452	2.18814	8.7679		2.64594	0.503676	0.142205	0.429759		0.328255		0.151296		0.117764	0.0161541	1.44632	1.37167	1.7156	0.158129
3	L	P	L grey		103.21	3093.99		615.291	1712.18	35.6514				15.4463	2.05392	0.998912	5.65152	102.842	1.46754	3.02812	12.2938		3.7788	0.751321	0.198681	0.618965		0.472685		0.205383		0.161537	0.023381	1.94476	1.38384	1.71599	0.137307
3	L	P	grey		263.396	5510.52		1583.61	2174.76	160.827				46.1667	2.80681	1.6898	17.6171	164.993	6.72558	4.48523	12.1428		4.40959	0.884806	0.252094	0.786979		0.772762		0.503603		0.531316	0.0844841	4.53622	0.623186	1.25414	0.152893
3	L	P	dk grey		495.361	6562.81		1726.42	2856.81	192.946				53.9668	5.40766	2.82754	24.8691	193.644	11.1093	10.112	26.553		10.0513	2.06366	0.586107	1.78917		1.74119		1.08011		1.09318	0.175193	9.90521	0.682857	1.21167	0.157192
3	L	P	black		637.853	4543.3		834.857	2182.24	58.3153				25.2978	9.55557	4.51188	15.3612	191.756	7.64306	15.3526	49.6288		17.9596	3.63388	0.984031	2.9653		2.30995		1.09129		0.92495	0.132401	10.2039	1.22532	1.40256	0.14966
3	L	P	v black		1547.9	7540.48		1230.91	4087.94	142.321				46.5672	13.0555	10.755	118.986	372.532	21.7892	26.3146	68.2226		28.374	5.96322	1.62612	5.01994		4.32648		2.29775		2.10446	0.312722	21.6554	0.923086	1.16096	0.145979
3	L	P	black1		263.396	5510.52		1583.61	2174.76	160.827			44.7972	46.1667	2.80681	1.6898	17.6171	164.993	6.72558	4.48523	12.1428		4.40959	0.884806	0.252094	0.786979		0.772762		0.503603		0.531316	0.0844841	4.53622	0.623186	1.25414	0.152893
3	L	P	c1ear1		58.709	4530.13		1254.98	2022.96	133.699			1.0485	35.4706	0.804386	0.677783	11.029	116.123	0.858473	1.37007	4.69046		1.4057	0.27217	0.0891741	0.226482		0.188238		0.104831		0.097426	0.0134936	1.00005	1.03813	1.56166	0.228213
3	L	G	prec		42.4769	3058.32		606.847	1166.59	45.1301			0.799445	15.0161	0.349977	0.402514	8.66788	83.9759	0.41316	0.607207	1.86978		0.568207	0.108748	0.0327433	0.0972241		0.0969038		0.0643119		0.0668869	0.0110996	0.59759	0.670164	1.45141	0.175726
3	L	P	c1ear2		67.4279	4784.3		1292.97	2015.36	138.662			1.64582	36.9694	0.907882	0.752655	10.1796	120.568	1.01177	1.50467	5.03988		1.51583	0.299922	0.0934825	0.254038		0.211402		0.116161		0.113513	0.0178654	1.15424	0.978542	1.5381	0.202689
3	L	P	black2		495.361	6562.81		1726.42	2856.81	192.946			27.7267	53.9668	5.40766	2.82754	24.8691	193.644	11.1929	10.112	26.553		10.0513	2.06366	0.586107	1.78917		1.74119		1.08011		1.09318	0.175193	9.90521	0.682857	1.21167	0.157192
2	H	G	POC	17	1070.37		654.431	3686.18		59.327	82.017	12.843	20.392	49.837	7.666	7.323	5.942	241.01	6.03	13.267	32.972	3.5	13.416	2.703	0.675	2.526	0.34	1.994	0.398	1.125	0.182	1.166	0.195	11.353	0.839963	1.05165	0.0844579
2	H	G	POC	17	1541.12		667.353	3426.73		60.8	118.894	17.92	25.93	46.649	8.284	10.394	5.993	243.781	7.624	13.6	31.12	3.594	14.165	2.798	0.742	2.52	0.357	2.339	0.418	1.168	0.186	1.263	0.206	12.284	0.794916	0.964379	0.118928
2	H	G	POC	19	328.376		686.409	3649.27		46.344	67.128	7.479	14.361	42.912	0.504	3.802	2.911	140.609	3.207	0.9	2.29	0.234	1.001	0.186	0.064	1.30787e-05	0.029	0.165	0.032	0.098	0.015	0.093	0.015	0.795	0.714406	1.07035	0.54853
2	H	G	POC	19	0.227797		687.656	3657.81		46.099	66.797	7.501	14.3	41.642	0.503	3.807	2.871	139.318	3.208	0.896	2.185	0.234	0.99	0.184	0.063	0.21	0.028	0.162	0.032	0.097	0.014	0.092	0.015	0.795	0.718962	1.02854	0.173643
2	H	G	POC	22	523.102		591.557	3696.5		49.948	38.603	7.875	16.314	46.027	12.639	3	3.225	249.758	3.775	23.895	54.677	6.356	23.486	4.258	0.898	3.222	0.395	2.382	0.469	1.368	0.226	1.543	0.263	13.31	1.14321	1.02103	0.0569394
2	H	G	POC	22	103.111		545.669	3877.6		45.578	4.195	7.213	2.4	42.627	6.291	0.627	1.104	174.778	1.289	13.392	33.637	0.3549	12.767	2.274	0.513	1.835	0.235	1.302	0.258	0.687	0.105	0.735	0.114	6.313	1.34507	1.14119	0.0727342
2	H	G	POC	23	207.276		642.276	3571.05		39.149	46.035	4.607	7.599	36.573	2.236	1.582	3.926	141.416	3.794	3.905	11.169	1.082	4.159	0.932	0.238	0.789	0.109	0.62	0.124	0.327	0.047	0.286	0.052	3.268	1.00795	1.13042	0.116243
2	H	G	POC	23	131.083		555.713	3601.97		40.543	22.497	5.36	4.509	39.989	1.666	1.073	2.912	153.448	2.507	2.958	7.673	0.771	3.1	0.624	0.191	0.638	0.077	0.469	0.087	0.243	0.043	0.263	0.04	2.352	0.830287	1.08186	0.151844
2	H	G	POC	25	931.598		427.111	2172.48		33.831	5.77	7.107	10.12	31.545	9.823	4.785	3.618	216.002	3.685	21.244	55.833	6.211	21.933	4.429	1.055	3.326	0.418	2.386	0.446	1.128	0.174	1.212	0.194	11.764	1.29396	1.10155	0.111378
2	H	G	POC	25	15.471		629.115	3958.36		44.014	1.326	6.092	0.398	42.867	0.083	0.197	1.55	86.639	1.414	0.274	0.605	0.073	0.293	0.065	0.018	0.072	0.007	0.054	0.011	0.035	0.005	0.031	0.002	0.35	0.652491	0.875054	0.0889113
2	H	G	POC	27	408.387		686.515	3854.07		49.634	59.666	6.543	9.162	45.973	4.793	2.248	4.074	93.003	5.141	8.694	21.638	2.393	9.34	1.952	0.485	1.554	0.196	1.14	0.199	0.533	0.068	0.46	0.064	5.195	1.39524	1.01067	0.117538
2	H	G	POC	27	84.749		626.565	3669.14		43.261	9.159	5.627	1.819	41.419	0.856	0.588	1.38	76.948	1.438	1.706	4.444	0.466	1.825	0.464	0.111	0.352	0.048	0.218	0.044	0.112	0.014	0.089	0.02	1.122	1.41506	0.968567	0.11115
2	H	G	POC	27	84.002		652.341	3899.74		49.061	9.435	6.504	2.135	46.544	0.751	0.625	2.014	91.013	1.632	1.509	3.801	0.411	1.712	0.378	0.111	0.297	0.041	0.218	0.036	0.09	0.022	0.108	0.014	1.085	1.03146	0.973765	0.192875
2	H	G	POC	27	464.781		740.207	3787.47		54.297	51.04	8.576	11.444	48.995	4.823	2.224	5.182	169.72	3.539	9.223	23.127	2.572	9.324	1.92	0.453	1.543	0.228	1.357	0.263	0.71	0.099	0.739	0.126	6.815	0.921326	1.05163	0.0930761
2	H	G	POC	29	144.865		683.884	3805		50.58	10.222	7.554	3.198	46.572	2.932	0.752	2.2	148.962	1.616	5.842	15.075	1.529	5.852	1.251	0.305	0.989	0.138	0.863	0.161	0.482	0.069	0.467	0.08	4.147	0.923486	1.06943	0.110792
2	H	G	POC	29	124.251		640.059	3752.96		46.419	6.46	7.013	3.844	42.546	2.018	0.718	1.808	126.069	1.552	4.176	11.683	1.133	4.259	0.932	0.237	0.824	0.112	0.664	0.115	0.328	0.052	0.335	0.057	2.951	0.920241	1.13904	0.104848
2	H	G	POC	29	271.879		661.494	3606.39		49.585	7.893	6.6	6.94	45.26	3.985	1.363	1.969	136.219	1.56	8.218	21.926	2.28	8.436	1.671	0.432	1.41	0.191	1.147	0.226	0.599	0.099	0.584	0.112	5.692	1.03882	1.12992	0.1223
2	H	G	POC	29	294.398		687.814	3547.75		49.194	5.473	5.68	6.697	43.813	4.521	1.394	1.827	138.574	1.454	9.377	25.325	2.551	9.738	2.052	0.498	1.653	0.222	1.336	0.258	0.682	0.109	0.682	0.114	6.455	1.015	1.10897	0.104827
2	H	G	POC	29	376.709		647.317	3654.51		54.716	7.23	7.168	11.839	46.58	7.461	1.614	1.863	156.228	1.563	15.928	40.705	4.401	16.335	3.285	0.767	2.704	0.361	2.242	0.415	1.109	0.177	1.107	0.181	10.601	1.06218	1.07595	0.0834186
2	H	G	POC	29	396.559		690.683	4095.8		59.277	6.347	8.705	11.146	55.18	11.774	1.607	1.853	192.897	1.996	24.435	60.936	6.936	25.879	5.13	1.31	4.41	0.586	3.493	0.648	1.75	0.272	1.765	0.283	17.124	1.02201	1.04218	0.112879
2	H	G	POC	29	542.397		688.243	4142.34		68.568	11.423	11.967	23.687	63.847	20.567	2.051	2.36	231.193	2.484	42.65	96.488	11.537	46.459	8.828	2.115	7.102	1.013	6.523	1.091	2.99	0.472	2.866	0.488	28.707	1.09857	0.951059	0.0995053
2	H	G	POC	29	646.999		667.095	4027.34		62.488	13.114	9.526	8.001	59.742	25.816	2.46	2.564	259.105	2.495	55.697	130.813	16.143	63.586	11.822	3.042	9.942	1.339	8.166	1.471	3.902	0.593	3.756	0.587	37.518	1.09469	0.977007	0.120992
2	H	G	POC	29	104.04		909.317	4464.96		72.769	9.673	6.686	3.883	62.527	1.171	0.813	2.38	127.735	1.808	2.563	6.545	0.611	2.578	0.618	0.162	0.544	0.061	0.421	0.074	0.214	0.036	0.173	0.036	2.08	1.09367	1.00461	0.119016
2	H	G	POC	31	15.407		214.552	2458.99		22.336	1.931	21.694	0.441	13.291	0.23	0.322	1.266	85.931	2.356	0.121	0.667	0.064	0.215	0.049	0.01	0.044	0.006	0.029	0.008	0.022	0.005	0.02	0.004	0.164	0.446623	1.65776	0.00584656
2	H	G	POC	31	15.719		221.858	2149.05		22.549	2.062	23.458	0.438	13.896	0.234	0.304	1.715	89.514	2.484	0.2	0.654	0.071	0.216	0.068	0.017	0.048	0.005	0.032	0.006	0.016	0.006	0.022	0.004	0.169	0.671109	1.0847	0.144857
2	H	G	POC	31	13.293		213.1	2152.27		22.208	1.689	19.712	0.378	13.17	0.198	0.305	1.194	90.078	1.834	0.199	0.579	0.064	0.222	0.051	0.014	0.047	0.007	0.034	0.008	0.019	0.004	0.015	0.003	0.153	0.979372	1.11289	0.128739
2	H	G	POC	31	13.072		209.223	2255.66		22.224	1.683	20.045	0.344	13.681	0.169	0.337	1.053	91.197	1.732	0.186	0.556	0.055	0.207	0.044	0.012	0.045	0.005	0.031	0.005	0.017	0.002	0.015	0.004	0.151	0.915393	1.18615	0.101655
2	H	G	POC	31	12.677		222.933	2407.87		23.193	1.691	22.366	0.374	14.306	0.178	0.301	1.123	95.566	1.895	0.195	0.555	0.064	0.214	0.04	0.016	0.031	0.006	0.024	0.004	0.017	0.004	0.024	0.004	0.161	0.599804	1.20098	0.329977
2	H	G	POC	31	13.241		211.862	2291.21		21.829	1.68	18.873	0.375	13.334	0.188	0.277	0.688	91.481	1.489	0.195	0.57	0.06	0.218	0.036	0.013	0.05	0.005	0.03	0.005	0.014	0.005	0.015	0.004	0.149	0.959686	1.28669	0.145615
2	H	G	POC	31	16.152		211.731	2366.99		25.109	2.452	29.494	0.474	15.379	0.257	0.327	2.035	106.066	2.405	0.259	0.611	0.075	0.262	0.06	0.018	0.036	0.008	0.039	0.007	0.024	0.004	0.023	0.003	0.116	0.8313	0.944878	0.25486
2	H	G	POC	31	19.449		236.124	2236.99		23.557	2.554	20.348	0.552	14.457	0.222	0.455	2.652	100.87	1.55	0.239	0.645	0.072	0.269	0.052	0.016	0.036	0.005	0.041	0.006	0.022	0.007	0.02	0.003	0.182	0.882173	1.11089	0.238865
2	H	G	POC	34	34.319		427.064	2950.32		30.494	1.969	7.463	1.193	18.892	0.523	0.436	0.947	145.779	2.169	0.47	1.276	0.131	0.462	0.101	0.036	0.081	0.014	0.069	0.01	0.041	0.008	0.044	0.008	0.364	0.788553	1.12346	0.272701
2	H	P	Amber	5a	98.806		428.793	3197.42		43.177	2.218	4.65	1.249	24.722	2.199	1.226	2.182	118.245	2.576	4.011	12.869	1.156	4.236	0.954	0.263	0.782	0.08	0.562	0.097	0.231	0.035	0.209	0.035	2.186	1.41675	1.27003	0.156463
2	H	P	Amber	5b	93.983		437.877	2827		42.317	1.851	3.935	1.167	24.365	2.097	1.117	1.739	112.149	2.187	3.773	11.739	1.07	3.937	0.855	0.229	0.676	0.084	0.459	0.086	0.2	0.031	0.181	0.032	2.039	1.53884	1.25834	0.151599
2	H	P	Amber	6a	667.021		208.238	2098.82		11.423	18.352	1.379	1.971	6.602	0.551	10.012	1.503	63.057	1.13	0.815	2.853	0.231	0.721	0.18	0.048	0.072	0.014	0.103	0.022	0.052	0.008	0.05	0.01	0.492	1.2033	1.43171	0.268665
2	H	P	Amber	6b	780.926		227.507	2140.61		14.952	19.309	3.68	2.488	8.694	0.732	12.362	2.144	95.804	2.055	1.099	2.958	0.261	0.937	0.224	0.06	0.173	0.022	0.138	0.025	0.066	0.013	0.096	0.013	0.654	0.845108	1.13874	0.156541
2	H	P	Amber	7a	79.576		405.928	2670.43		34.58	9.384	6.241	2.007	21.123	1.59	0.966	1.975	97.231	2.269	3.094	9.483	0.93	3.218	0.579	0.166	0.573	0.065	0.368	0.063	0.16	0.02	0.142	0.023	1.53	1.60849	1.34202	0.131142
2	H	P	Amber	7b	30.226		395.055	2855.51		35.749	2.018	5.654	0.56	21.114	0.537	0.625	1.926	97.568	1.808	0.459	1.378	0.144	0.566	0.108	0.034	0.111	0.012	0.091	0.018	0.038	0.009	0.035	0.007	0.407	0.968123	1.19415	0.162806
2	H	P	grey	8a	24.236		446.66	3273.36		41.317	1.933	4.763	0.65	24.632	0.446	0.538	1.383	166.599	1.618	0.413	1.197	0.132	0.424	0.119	0.036	0.101	0.014	0.058	0.012	0.031	0.005	0.039	0.007	0.336	0.781756	1.04757	0.189278
2	H	P	grey	8b	22.786		392.193	2954.08		37.768	1.829	4.593	0.647	21.849	0.398	0.44	1.063	164.819	1.308	0.358	1.222	0.107	0.415	0.075	0.037	0.08	0.008	0.056	0.015	0.039	0.005	0.031	0.005	0.307	0.852525	1.42776	0.34894
2	H	P	grey	9a	23.281		406.561	2944.7		39.554	1.623	4.17	0.626	23.125	0.467	0.496	1.279	166.105	1.41	0.408	1.2	0.12	0.418	0.085	0.04	0.087	0.008	0.046	0.012	0.03	0.005	0.035	0.006	0.329	0.860553	1.23311	0.338381
2	H	P	grey	9b	23.637		399.346	2967.39		38.149	1.613	4.528	0.66	21.659	0.524	0.419	1.436	159.838	1.337	0.429	1.27	0.122	0.423	0.11	0.043	0.092	0.009	0.056	0.011	0.03	0.006	0.029	0.009	0.342	1.09206	1.13206	0.303793
2	H	P	grey	10a	21.024		514.368	3717.91		42.325	1.961	5.573	0.58	28.745	0.245	0.474	1.721	197.313	1.582	0.311	0.796	0.096	0.313	0.1	0.03	0.096	0.009	0.05	0.009	0.026	0.004	0.039	0.008	0.319	0.588683	0.874617	0.157928
2	H	P	grey	10b	18.835		449.274	3083.51		38.141	1.855	4.89	0.512	24.06	0.257	0.393	1.447	171.487	1.517	0.288	0.815	0.084	0.334	0.067	0.019	0.058	0.01	0.045	0.01	0.028	0.003	0.034	0.003	0.269	0.625316	1.13132	0.156867
2	H	P	grey	11	206.967		474.134	2654.91		38.5	3.503	6.367	2.498	25.24	3.718	1.313	1.554	161.183	3.557	7.717	21.955	2.16	7.919	1.646	0.436	1.37	0.199	1.095	0.197	0.513	0.071	0.402	0.075	5.151	1.41713	1.18105	0.135823
2	H	P	grey	11	278.146		461.203	2237.9		36.464	7.205	3.618	4.124	21.642	2.93	3.04	1.988	131.041	2.079	5.613	17.495	1.656	5.663	1.309	0.328	0.971	0.135	0.765	0.149	0.372	0.055	0.38	0.057	3.473	1.09043	1.24471	0.135877
2	H	P	grey	11	185.871		420.283	2551.89		40.48	3.432	6.252	2.565	26.43	3.645	1.253	1.339	170.673	3.028	7.74	21.472	2.192	8.033	1.782	0.45	1.403	0.187	1.035	0.191	0.484	0.079	0.426	0.069	5.168	1.34127	1.11418	0.126921
2	H	P	grey	12	100.054		572.183	2899.88		59.328	10.33	6.594	2.887	32.132	1.479	0.817	2.004	137.926	2.244	2.797	7.518	0.716	2.825	0.635	0.15	0.504	0.067	0.406	0.076	0.192	0.027	0.162	0.027	1.65	1.27457	1.08621	0.096233
2	H	P	grey	12	106.258		585.493	2859.97		58.692	10.55	5.36	3.08	30.466	1.557	0.809	1.789	130.457	1.84	2.85	8.333	0.78	2.816	0.612	0.163	0.504	0.075	0.391	0.065	0.192	0.025	0.159	0.027	1.669	1.32322	1.21031	0.140492
2	H	P	grey	13a	96.263		464.346	2902.42		39.746	1.718	3.879	1.059	23.436	2.066	0.875	1.157	112.841	1.513	3.691	11.005	1.055	3.804	0.807	0.234	0.615	0.085	0.477	0.08	0.213	0.032	0.181	0.028	1.984	1.5054	1.22474	0.193747
2	H	P	grey	15	168.741		471.285	2458.83		37.376	3.102	4.607	1.784	22.783	2.719	1.155	1.559	120.682	1.807	4.94	15.387	1.495	5.449	1.113	0.278	0.871	0.114	0.674	0.115	0.305	0.045	0.277	0.041	3.226	1.31654	1.26293	0.123435
2	H	P	grey	15	188.262		464.288	2726.76		37.597	3.196	4.733	1.901	22.799	2.87	1.101	1.444	126.136	1.673	4.955	15.585	1.468	5.12	1.059	0.298	0.897	0.123	0.675	0.132	0.329	0.049	0.333	0.053	3.26	1.09846	1.3046	0.158284
2	H	P	black	41	178.686		366.069	2851.12		36.818	46.295	11.112	8.365	27.301	1.02	1.641	4.226	132.663	5.364	1.603	4.707	0.413	1.51	0.32	0.101	0.321	0.048	0.283	0.048	0.147	0.03	0.192	0.032	1.267	0.616337	1.25296	0.169694
2	H	P	black	41	163.989		374.02	2672.47		36.105	36.062	8.229	6.426	27.814	0.9	1.522	3.317	126.69	4.112	1.459	4.597	0.373	1.433	0.302	0.091	0.291	0.037	0.226	0.046	0.132	0.022	0.137	0.026	1.082	0.786177	1.32455	0.158979
2	H	P	black	41	147.657		362.34	2730.68		34.208	28.998	9.902	5.703	25.749	0.772	1.482	3.477	119.074	3.635	1.203	3.888	0.333	1.226	0.295	0.076	0.241	0.034	0.181	0.04	0.108	0.022	0.134	0.022	0.938	0.662745	1.26172	0.127769
2	H	P	black	41	143.516		357.971	2932.49		36.649	25.718	11.352	5.187	28.159	0.781	1.447	3.124	128.064	3.618	1.252	3.736	0.333	1.294	0.3	0.088	0.219	0.036	0.215	0.039	0.117	0.022	0.131	0.026	0.924	0.705535	1.17725	0.207554
2	H	P	black	41	145.944		339.95	2558.85		33.786	25.716	6.657	5.015	25.957	0.731	1.338	2.307	121.098	2.63	1.193	3.691	0.33	1.201	0.252	0.077	0.246	0.033	0.198	0.042	0.114	0.017	0.134	0.022	0.905	0.657236	1.28964	0.162007
2	H	P	black	41	157.718		344.078	2727.67		35.173	32.145	12.557	6.213	26.553	0.762	1.506	3.115	124.38	4.044	1.284	3.906	0.357	1.302	0.213	0.088	0.232	0.037	0.228	0.043	0.126	0.019	0.141	0.024	0.982	0.672251	1.394	0.266799
2	H	P	black	41	187.657		390.523	2855.22		35.209	51.136	10.127	9.844	26.081	0.945	1.55	3.698	123.312	4.533	1.49	4.405	0.418	1.43	0.378	0.104	0.285	0.043	0.246	0.052	0.149	0.022	0.165	0.023	1.162	0.666635	1.13618	0.173152
2	H	P	black	41	162.489		353.85	2840.7		34.074	38.876	11.713	7.855	26.145	0.781	1.528	2.787	122.426	3.932	1.253	3.975	0.349	1.256	0.307	0.085	0.217	0.029	0.198	0.041	0.119	0.02	0.147	0.023	0.969	0.629245	1.23896	0.188928
2	H	P	black	41	162.28		352.809	2691.85		32.731	37.48	6.598	7.425	23.946	0.732	1.362	2.661	113.618	3.013	1.182	3.956	324	1.199	0.281	0.075	0.221	0.031	0.19	0.041	0.122	0.021	0.14	0.023	0.897	0.623269	1.32511	0.151195
2	H	P	black	41	43.1372		505.438	3307.37		45.645	218.474	33.841	39.863	36.78	2.031	3.182	8.319	178.15	15.238	3.074	8.136	0.804	3.178	0.65	0.215	0.625	0.086	0.585	0.126	0.384	0.062	0.398	0.019	2.991	0.570173	1.10276	0.199961
2	H	P	black	43	33.514		300.554	2454.83		28.341	3.126	15.775	1.048	16.754	0.659	0.594	2.845	90.601	3.689	0.644	1.972	0.192	0.696	0.161	0.055	0.143	0.016	0.093	0.018	0.047	0.01	0.046	0.008	0.402	1.03351	1.18486	0.232026
2	H	P	black	43	33.552		268.948	2239.45		28.118	2.441	12.523	0.999	16.86	0.683	0.565	1.663	86.377	3.228	0.748	2.532	0.233	0.818	0.186	0.056	0.138	0.019	0.098	0.017	0.057	0.009	0.049	0.007	0.452	1.12692	1.31305	0.215577
2	H	P	black	43	16.846		265.624	2358.83		24.743	2.244	14.021	0.57	14.65	0.237	0.399	1.532	78.49	2.825	0.241	0.756	0.069	0.224	0.05	0.011	0.047	0.006	0.03	0.009	0.022	0.005	0.021	0.004	0.174	0.847195	1.31746	0.0280828
2	H	P	black	43	17.188		274.669	2061.51		24.978	2.396	15.161	0.567	15.317	0.241	0.377	2.075	81.763	2.979	0.217	0.742	0.077	0.226	0.07	0.018	0.051	0.006	0.034	0.006	0.016	0.006	0.022	0.004	0.179	0.728153	1.16647	0.150762
2	H	P	black	43	14.535		263.826	2064.6		24.601	1.964	12.74	0.489	14.517	0.204	0.379	1.444	82.278	2.199	0.211	0.656	0.069	0.232	0.052	0.015	0.05	0.007	0.036	0.008	0.019	0.004	0.015	0.003	0.162	1.03843	1.21096	0.140523
2	H	P	black	43	14.293		259.026	2163.79		24.618	1.956	12.955	0.445	15.08	0.174	0.418	1.273	83.3	2.077	0.203	0.63	0.059	0.216	0.046	0.013	0.048	0.005	0.032	0.005	0.018	0.002	0.015	0.004	0.159	0.999058	1.25518	0.1123
2	H	P	black	43	13.861		276	2309.8		25.692	1.965	14.456	0.484	15.769	0.183	0.374	1.358	87.291	2.272	0.212	0.629	0.07	0.223	0.041	0.017	0.033	0.007	0.025	0.004	0.017	0.004	0.024	0.004	0.17	0.652094	1.28232	0.337619
2	H	P	black	43	14.478		262.294	2197.89		24.181	1.953	12.198	0.484	14.697	0.194	0.344	0.832	83.559	1.785	0.212	0.646	0.065	0.227	0.037	0.014	0.053	0.005	0.032	0.006	0.014	0.005	0.015	0.004	0.157	1.04335	1.3704	0.157496
2	H	P	black	43	17.661		262.131	2270.58		27.814	2.85	19.062	0.612	16.952	0.265	0.405	2.461	0.00881	2.884	0.282	0.693	0.082	0.273	0.062	0.019	0.039	0.008	0.041	0.008	0.024	0.004	0.023	0.003	0.186	0.905122	1.00704	0.255429
2	H	P	black	43	21.266		292.331	2145.87		26.096	2.968	13.151	0.714	15.936	0.229	0.565	3.208	92.136	1.859	0.26	0.731	0.078	0.28	0.053	0.017	0.039	0.005	0.043	0.006	0.022	0.007	0.02	0.003	0.193	0.959686	1.18945	0.24475
2	H	P	black	43	30.65		242.766	2559.06		25.535	2.69	24.408	0.81	15.2	0.64	0.479	2.352	99.19	3.076	0.591	1.74	0.177	0.668	0.156	0.051	0.135	0.015	0.09	0.018	0.046	0.009	0.046	0.009	0.38	0.948452	1.11054	0.218707
2	H	P	black	43	30.685		217.237	2334.54		25.383	2.1	19.376	0.773	15.296	0.663	0.455	1.375	94.566	2.692	0.687	2.234	0.215	0.785	0.18	0.051	0.13	0.018	0.094	0.016	0.056	0.009	0.049	0.007	0.427	1.03501	1.23092	0.194647
2	H	P	black	44	1867.14		1447.66	2497.07		48.184	7.9	87.256	1.519	34.64	6.06	15.452	20.243	238.865	61.612	8.824	20.601	2.173	8.316	1.728	0.427	1.494	0.21	1.335	0.301	0.91	0.133	0.963	0.194	7.825	0.676433	1.00398	0.0973499
2	H	P	black	45	1456.76		1080.94	3265.34		60.056	566.922	46.142	109.498	52.403	9.071	11.615	12.065	290.393	2.7313	14.202	32.029	3.732	14.969	2.995	0.737	2.549	0.342	2.121	0.42	1.184	0.183	1.274	0.22	11.408	0.822936	0.940713	0.0989899
2	H	P	black	45	52.064		568.519	3325.34		39.088	14.92	7.911	3.973	37.425	0.853	0.394	3.247	167.438	2.182	1.521	3.934	0.391	1.494	0.33	0.088	0.283	0.03	0.199	0.046	0.126	0.023	0.128	0.025	1.088	0.877213	1.06595	0.132224
2	H	P	black	46	937.875		694.014	2844.89		44.999	260.407	27.484	47.15	41.324	7.657	5.534	16.416	227.212	2.134	14.275	33.507	3.868	14.905	3.016	0.831	2.761	0.387	2.188	0.434	1.157	0.176	1.192	0.189	11.559	0.884068	0.978324	0.131862
2	H	P	black	46	235.734		545.727	3096.86		33.201	51.347	7.141	9.23	30.885	1.638	1.123	3.376	142.224	4.814	2.784	8.447	0.795	2.894	0.672	0.17	0.538	0.073	0.473	0.091	0.269	0.049	0.29	0.042	2.221	0.708691	1.19305	0.124166
2	H	P	black	47	250.132		757.76	3339.73		49.37	235.948	36.765	52.543	49.755	9.821	16.841	6.435	254.66	14.697	15.662	35.43	4.145	15.991	3.323	0.787	2.785	0.371	2.425	0.493	1.35	0.22	1.468	0.284	13.575	0.787602	0.941189	0.0857125
2	H	P	black	47	1124.7		571.013	3059.77		37.065	67.045	10.639	11.549	33.96	2.179	8.905	2.558	144.103	3.957	3.427	9.34	0.932	3.239	0.687	0.19	0.673	0.09	0.54	0.105	0.314	0.055	0.369	0.059	2.809	0.685604	1.16095	0.117894
2	H	P	black	49	753.584		690.94	3046.82		43.78	171.426	17.641	27.444	40.96	6.913	3.824	7.185	194.598	11.845	13.264	33.616	3.652	14.151	2.915	0.753	2.702	0.352	2.185	0.419	1.129	0.181	1.136	0.192	11.49	0.86195	1.03875	0.101018
1	L	P	white	NSW white		7700	810	2000	1350	93				50	0.3					0.7	1.3			0.11	0.04			0.1				0.05			1.03351
1	C	P	white	SA white		7100	450	1800	1900	310				97	0.47					1.4	2.6			0.17	0.05			0.13				0.07			1.47644
1	L	P	black	NSW black	720	7700	1200	2000	2400	140	280			52	8.1	6.2	30		9.8	19	35		15	3.7	0.9		0.4	2				1.2	0.19		1.16885	0.917796
1	C,A	P	black	SA black	42	6500	380	1400	1900	240	21			57	0.31	0.5			0.7	1.5	2.5		1.9	0.13	0.05		0.04	0.25				0.08	0.01		1.38416	0.700106
1	L	P	grey	NSW grey	760	9400	1000	2100	2500	230	110			78	7.5	6.7	16		9	23	45		18	3.9	1.1		0.5	2.5				1.7	0.3		0.998768	0.977419
6	C	P	white	cp9-w	6.11	7950	528	3130	876	207	0.103	0.268	0.044	143	0.077	0.092	0.216	169		0.505	0.884		0.46	0.092	0.035	0.102			0.02	0.047		0.037		0.563	1.00757	0.832725	0.226609
6	C	P	grey	cp1-g	145	5280	688	1740	1800	67	3.02	4.86	3.05	56.1	1.61	1.09	125	110		2.71	12		3.72	0.716	209	0.66			0.13	0.365		0.214		2.42	0.934849	1.7974	0.155361
6	C	P	green	cp1-gr	37	5070	592	1630	1390	53.2	0.226	4.46	1.48	47.8	0.309	0.546	626	94.7		0.568	2.13		0.7	0.146	0.045	0.192			0.02	0.054		0.042		0.565	0.998355	1.59319	0.0914634
6	A	P	clear	a8-cl	8.11	4800	786	410	1170	218		0.4	0.0188	11.5	0.215	0.129	0.492	295		0.951	2.41		1.38	0.304	0.0779	296			0.0613	0.169		0.143		1.9	0.490942	1.00365	0.0861807
6	A	P	grey	a2-g	59.4	5150	993	590	1250	492	0.296	0.368	0.102	23.8	0.423	0.383	0.623	222		1.53	3.16		1.57	0.308	0.098	0.313			0.052	0.158		0.132		1.76	0.855664	0.942081	0.170119
6	A	P	clear	a2-cl	18.7	4010	569	280	704	214	13.5	0.407	0.149	10.2	0.213	0.202	0.77	188		0.804	1.67		0.767	0.159	0.045	0.148			0.029	0.085		0.063		0.908	0.942109	0.972498	0.139722
6	A	P	white	a1-w	22.4	3730	546	1050	1570	108	4.26	3.92	0.152	47.1	0.148	0.271	3.66	76		0.282	1.29		0.306	0.142	0.0648	0.047			0.0073	0.0222		0.0269		0.263	0.773896	2.04355	0.526861
6	A	G		a1-poc	17.4	3670	558	1040	1400	102	4.47	4.7	0.131	45.4	0.122	0.525	5.81	73.7		0.235	1.18		0.245	0.27	0.032	0.305			0.01	0.063		0.074		0.5	0.234435	2.27704	-0.284527
6	L	P	grey	l15-g	97.6	9320	1080	3090	1630	130	2.07	1.58	4.13	88.7	1.15	0.775	1.54	86.2		2.61	5.31		2.34	0.445	0.163	0.398			0.073	0.2		0.219		2.01	0.879796	0.973015	0.260765
6	L	G		l15-poc	46.4	8780	1020	2980	1260	110	0.944	0.885	1.12	81.1	0.692	0.339	0.975	81.9		1.06	2.2		0.981	0.19	0.071	0.17			0.038	0.112		0.122		1.13	0.641404	0.981988	0.269354
6	L	P	black	l14-bl	538	6360	815	1660	1600	103	100	3.62	17.8	47.2	2.61	4.87	9.63	177		4.72	10.2		4.33	0.814	0.237	0.692			0.127	0.353		0.357		3.35	0.976022	1.02554	0.17229
6	L	G		l14-poc	51.4	5590	569	1520	1170	73.3	3.37	0.625	1.08	39.1	0.425	0.431	0.817	148		0.744	1.65		0.726	0.142	0.047	0.123			0.022	0.06		0.06		0.64	0.915393	1.0301	0.223864
6	L	P	grey	L13-g	91.6	4290	382	758	1100	45.5	1.94	1.39	3.12	23.4	4.32	1.24	1.63	138		6.21	18.3		8.35	1.72	0.48	1.12			0.16	0.36		0.35		3.47	1.30981	1.20694	0.208285
6	L	P	violet	L13-v	15	4150	360	772	824	40.1	0.84	0.363	0.346	19.3	0.571	0.348	12.1	107		0.448	1.08		0.484	0.096	0.034	0.078			0.012	0.034		0.045		0.368	0.734939	1.07873	0.267153
6	L	P	white	l9-w	24.6	7600	436	2460	2300	279	0.166	0.39	0.179	127	0.498	0.315	0.755	151		0.786	1.6		0.726	0.143	0.05	0.106			0.021	0.066		0.055		0.691	1.05498	0.963779	0.280722
6	L	P	clear	l9-cl	16.5	6950	423	2410	1630	256	0.129	0.288	0.09	122	0.386	0.232	0.325	147		0.586	1.22		0.549	0.103	0.038	0.105			0.017	0.048		0.042		0.553	1.02999	0.980898	0.233646
6	L	P	grey	l7-g	1710	8970	1170	1890	2880	153	65.8	32.3	28.3	72.6	12.3	6.53	11.8	301		24.2	69.2		26.7	5.35	1.45	4.87			1.04	3.06		3.34		27.4	0.534878	1.26935	0.125988
6	L	G		l7-poc	50.1	5590	988	1640	887	81.3	2.87	4.13	2.15	45.2	0.632	0.531	4.45	52.5		1.17	4.13		1.07	0.175	0.161	0.154			0.026	0.074		0.119		0.78	0.725813	1.67694	0.664343
6	L	P	grey	l5-g	261	8650	741	2280	2320	151	26.9	0.947	7.3	66.7	4.89	1.67	1.69	111		8.44	19		9.41	1.91	0.576	1.56			0.231	0.588		0.541		5.92	1.15168	0.995294	0.196218
6	L	P	honey	l5-h	46.6	6980	669	2260	1150	118	2.83	1.24	1.32	58.7	0.806	0.37	0.677	94.3		1.06	2.19		1.02	0.192	0.07	0.205			0.034	0.088		0.101		0.891	0.774765	0.964384	0.217359
6	L	P	black	l2-bl	1770	13400	1280	2830		267	177	26.3	26	77.9	14.7	12	64.3	230		25.3	62.4		25.6	5.19	1.46	4.17			0.614	1.64		1.53		15.1	1.22072	1.13078	0.169512
6	L	P	grey	l2-g	1260	11500	1240	2760		249	93.8	8.45	19.7	73.8	13.1	12.2	19.4	189		19.2	48.4		19.2	3.85	1.06	3.02			0.422	1.13		1.05		10.6	1.34989	1.16067	0.165236
6	L	P	brown	l1-br	454	9650	647	3070		147	16.1	4.2	4.34	73.7	3.27	1.84	1.56	69.8		6.9	16.6		7.74	1.63	0.46	1.4			0.203	0.534		0.504		5.19	1.01066	1.06115	0.156488
6	L	P	clear	l1-cl	18.9	8720	608	2790		125	0.428	1.21	0.262	64.4	0.207	0.17	0.467	48.3		0.469	1.03		0.442	0.091	0.036	0.094			0.017	0.047		0.042		0.549	0.824346	1.03261	0.260807
7	L	G	grey	827	77.09	6931	648	1664	1342	118.66	5.47	2.01	1.68	47.18	0.86	0.58	0.69	161.33	0.39	1.796	4.213	0.442	1.705	0.333	0.097	0.266	0.042	0.256	0.051	0.154	0.023	0.193	0.024	1.35	0.686965	1.10197	0.18589
7	L	P	grey	234	n.d.	7449	791.6	2152	1619	182.66	4.29	0.95	2.53	64.45	1.12	0.73	1.7	n.d.	n.d.	2.331	4.775	0.552	2.191	0.446	0.146	0.379	0.058	0.348	0.069	0.201	0.029	0.216	0.029	1.68	0.796662	0.975109	0.223274
7	L	G	grey	234	n.d.	6656	724.9	2021	1287	151.02	1.29	0.43	0.94	55.95	0.59	0.32	0.55	n.d.	n.d.	1.039	2.135	0.246	0.991	0.199	0.061	0.172	0.026	0.163	0.033	0.098	0.014	0.117	0.014	0.84	0.655565	0.978207	0.191009
7	M	P	grey	847	2.47	5754	379.6	1023	2189	286.9	0.25	0.24	0.16	43.6	0.13	0.08	0.61	17.66	0.05	1.092	1.593	0.179	0.653	0.107	0.019	0.093	0.013	0.079	0.015	0.041	0.005	0.034	0.003	0.58	2.37099	0.775234	-0.0473289
7	Q	G	white	839	1.59	5314	60.8	933	1218	128.4	0.94	0.29	0.02	44.27	0.02	0.02	1.17	54.61	0	0.363	1.297	0.203	1.034	0.25	0.063	0.24	0.034	0.204	0.041	0.119	0.016	0.115	0.016	1.16	0.233021	1.16399	0.0822071
7	C	G	white	832	6.99	9122	786.1	3824	1350	301.49	0.22	0.09	0.03	184.97	0.1	0.1	0.41	104.3	0.04	0.824	1.524	0.151	0.608	0.11	0.019	0.109	0.015	0.094	0.019	0.053	0.007	0.057	0.005	0.69	1.06718	0.953438	-0.0892282
7	C	G	white	835	18.75	6292	298.9	1869	1527	119.41	0.23	0.16	0.15	85.86	0.26	0.27	0.32	177.42	0.07	0.404	0.84	0.094	0.376	0.073	0.02	0.063	0.009	0.056	0.011	0.032	0.004	0.057	0.004	0.33	0.52323	0.995626	0.142573
7	A	P	cream	844	26.33	9735	328.4	2255	3261	143.75	3.07	0.98	1.03	99.81	0.86	0.34	3.55	50.81	0.21	1.065	2.495	0.31	1.413	0.501	0.193	0.783	0.112	0.67	0.133	0.361	0.049	0.315	0.045	3.57	0.249589	1.03484	0.141046

## Sheet: Rock results
Study No	Location	Sample	Unit	Ti	Al	Fe	Ca	K	Ba	Cu	Ni	Pb	Sr	Th	V	Zn	Zr	As	La	Ce	Pr	Nd	Sm	Eu	Gd	Tb	Dy	Ho	Er	Tm	Yb	Lu	Y	(La/Yb)N	Ce/Ce*	Eu/Eu*
				mg/kg	mg/kg	mg/kg	mg/kg	mg/kg	mg/kg	mg/kg	mg/kg	mg/kg	mg/kg	mg/kg	mg/kg	mg/kg	mg/kg	mg/kg	mg/kg	mg/kg	mg/kg	mg/kg	mg/kg	mg/kg	mg/kg	mg/kg	mg/kg	mg/kg	mg/kg	mg/kg	mg/kg	mg/kg	mg/kg
9	A	AP2-001	Cadna-owie	4556.26	93624.5	10841.2	929.111	29304.2	377	3.9	2	2.9	82.3	23.3	110	4	267.8	1.3	55.1	120.5	13.55	47.4	8.7	1.63	6.8	1.1	6.51	1.14	3.31	0.5	3.23	0.45	32.8	1.25932	1.02763	-0.00118917
9	A	AP2-002	Cadna-owie	4856.01	90713.6	28606.8	857.641	21749.9	730	7.2	3.6	7.1	82.9	25.7	124	17	276.3	5.3	43.3	88.8	9.58	33.7	5.73	0.94	4.67	0.77	5.04	0.96	3.03	0.48	3.1	0.46	29.7	1.03113	0.998443	-0.0677403
9	A	AP2-003	Cadna-owie	3956.75	77482.3	103516	2715.86	19840.5	406	20.6	7.4	22.4	99.9	32.2	118	29	225.4	36.2	35.7	68.1	7.17	25.2	4.01	0.64	3.27	0.55	3.52	0.66	2.11	0.34	2.22	0.35	19.8	1.18714	0.957282	-0.0797967
9	A	AP2-004	Cadna-owie	4016.7	83251.2	13359.2	36092.4	20919.7	624	6.8	3.4	14.3	704.4	17.2	86	5	186.4	3.2	103	159.1	14.02	44	6.24	1.04	4.34	0.63	3.47	0.67	2.08	0.33	2.13	0.32	18.9	3.5698	0.859005	-0.0283106
9	A	AP2-005	Cadna-owie	4196.56	93942.1	30705.1	8433.47	21666.8	311	24.4	8.1	8.5	136.6	20.2	115	12	201.1	10.8	40.8	77.2	8.05	27.3	4.43	0.73	3.43	0.55	3.19	0.62	2.02	0.34	2.2	0.31	18.3	1.36906	0.954642	-0.0549669
9	A	AP2-006	Cadna-owie	3836.85	101669	21682.4	2501.45	22247.9	414	14.6	6	33.4	455.5	12.1	93	11	200.9	8.6	97	127.9	10.9	31.4	4.47	0.77	3.39	0.55	3.32	0.63	1.92	0.3	2	0.28	16.6	3.58037	0.763564	-0.0314093
9	A	AP2-007	Cadna-owie	659.459	37788.5	9372.4	643.231	2407.43	135	11.8	4.9	7.7	65.9	4.2	23	9	39.8	3.7	11.1	21.9	2.41	7.7	1.37	0.22	1.05	0.16	0.95	0.16	0.47	0.07	0.5	0.06	4.5	1.63885	0.966387	-0.0640683
9	A	AP2-008	Cadna-owie	779.36	25615.7	21472.6	11220.8	1079.19	64	15.7	9.1	5.4	79.2	4.2	25	13	39.1	4.3	8.4	14.6	1.3	5.1	1.08	0.22	1.01	0.18	1.02	0.19	0.56	0.09	0.51	0.08	4.7	1.21589	0.93737	-0.00416441
9	A	AP2-009	Cadna-owie	419.656	9314.82	94773.2	6503.78	498.088	86	11.8	9.5	15.8	33.9	10.7	106	35	32.3	12.4	3.2	9.9	0.8	3.2	0.78	0.16	0.74	0.12	0.75	0.13	0.4	0.06	0.36	0.05	3.5	0.656195	1.4454	-0.00443683
9	A	AP2-010	Cadna-owie	2877.64	6086.39	3986.77	1286.46	830.147	224	2.3	0.8	3	127.9	2.6	18	3	251.9	0.9	5.3	10.4	1.14	4.7	0.8	0.13	0.66	0.12	0.91	0.18	0.63	0.11	0.69	0.11	5.5	0.567038	0.964012	-0.0744747
9	A	AP2-011	Cadna-owie	1558.72	50808.1	7134.22	571.761	1826.32	76	1.5	1	0.6	36.1	2.5	18	2	79.6	1	7	12.8	1.33	5	0.83	0.15	0.8	0.13	0.79	0.16	0.5	0.08	0.56	0.08	4.6	0.922775	0.932891	-0.0631096
9	A	AP2-012	Cadna-owie	1258.97	34189.6	3287.34	929.111	913.162	70	1.6	0.9	0.8	34.9	1.9	17	0.3	40.4	0.6	5.1	8.4	0.98	3.5	0.65	0.12	0.61	0.1	0.71	0.13	0.44	0.06	0.41	0.07	3.7	0.918274	0.837519	-0.0476964
9	A	AP2-013	Cadna-owie	839.311	39958.5	3357.28	571.761	1411.25	84	1.6	0.5	0.7	34.3	1.8	11	1	38.4	<0.5	4.6	7.9	0.88	2.9	0.58	0.1	0.55	0.09	0.55	0.1	0.38	0.05	0.32	0.05	3.1	1.06119	0.874421	-0.0797828
9	A	AP2-014	Cadna-owie	1378.87	26674.3	4126.65	857.641	1079.19	94	1.3	0.4	1.1	32.5	2.4	22	1	50.2	<0.5	5.1	9.5	1.05	3.7	0.71	0.14	0.65	0.1	0.7	0.13	0.43	0.07	0.46	0.07	3.7	0.818461	0.927737	-0.0134481
9	A	AP2-015	Cadna-owie	1438.82	48214.8	9232.52	428.821	830.147	64	0.9	0.4	1	26.6	2.2	41	1	38.4	2.2	4.3	6.7	0.76	2.8	0.5	0.1	0.47	0.07	0.44	0.08	0.26	0.05	0.29	0.04	2.5	1.0946	0.811413	-0.0133099
9	A	AP2-016	Cadna-owie	539.557	24610.2	2797.73	192826	664.118	19	0.03	<0.1	0.2	253.5	1	11	0.3	28.9	1	3.6	6.2	0.69	2.4	0.45	0.07	0.27	0.04	0.26	0.05	0.18	0.03	0.2	0.03	1.6	1.3288	0.876395	-0.0303761
9	A	AP2-017	Cadna-owie	1438.82	30749.5	17765.6	571.761	1494.26	89	1.1	0.8	1.4	31.2	2.4	159	2	129.6	9.7	6	11.5	1.29	4.1	0.86	0.15	0.73	0.11	0.74	0.14	0.42	0.07	0.47	0.08	3.7	0.942408	0.941742	-0.0499101
9	A	AP2-018	Cadna-owie	1918.43	31331.7	7623.82	1643.81	996.176	99	0.9	0.5	1.9	33.9	1.8	72	0.3	130.6	1.9	5.8	10.7	1.21	4.5	0.78	0.17	0.7	0.11	0.72	0.12	0.42	0.07	0.49	0.07	3.8	0.873811	0.915063	0.0345278
9	A	AP2-019	Cadna-owie	1079.11	6245.16	19654.1	46741.4	498.088	88	2.8	0.6	1.9	77.1	1.5	114	9	84.8	11.3	3.2	6.7	0.74	3	0.53	0.09	0.42	0.07	0.48	0.09	0.26	0.05	0.31	0.05	2.7	0.762033	1.00465	-0.046786
9	A	AP2-020	Cadna-owie	3057.49	5027.88	4126.65	1357.93	1079.19	84	1.2	0.6	2.4	27	2.8	36	0.3	245	<0.5	9.7	15.2	1.81	6	1.14	0.22	1	0.19	1.33	0.27	0.91	0.15	1.09	0.17	7.6	0.656948	0.803641	-0.013218
9	A	AP2-021	Cadna-owie	5035.87	3016.73	5245.75	929.111	498.088	270	1.9	0.4	1.5	48.2	3.7	124	0.3	255	1.9	12.8	21.2	2.43	8.8	1.37	0.25	1.08	0.22	1.6	0.32	1.12	0.19	1.28	0.2	9.3	0.73822	0.84518	-0.0144323
9	A	AP3-001	Bulldog	4736.11	95529.8	11260.9	17081.4	24489.3	400	17.3	3.2	10.4	142.8	25.2	96	4	205.6	<0.5	55.6	117.8	13.62	51.4	10.3	1.9	8.44	1.31	7.29	1.29	3.6	0.53	3.43	0.48	34.1	1.19665	0.996909	-0.0179528
9	A	AP3-002	Bulldog	4376.41	83410	23710.8	26015.1	20421.6	448	33.9	8.2	4.7	525.3	21.7	109	12	209.1	4.6	59.4	104.8	10.82	36.2	5.6	0.89	3.99	0.65	3.9	0.71	2.25	0.38	2.27	0.34	21.2	1.93173	0.911064	-0.0537367
9	A	AP3-003	Bulldog	3956.75	84045.1	24620	30875.1	20919.7	328	32.2	8.2	1.9	179.8	15.6	93	17	159.2	4.4	39.8	74.3	8	26.9	4.38	0.72	3.25	0.56	3.48	0.61	1.91	0.31	2.04	0.3	17.6	1.44025	0.93661	-0.0472595
9	A	AP3-004	Bulldog	1918.43	40699.4	13079.4	139009	9214.63	167	9.9	2	1.6	251.8	6.5	105	2	90.9	3.1	19.5	36.2	3.65	12.5	2.02	0.35	1.56	0.28	1.76	0.34	1.03	0.16	1.2	0.16	9.3	1.19961	0.951207	-0.0326338
9	A	AP3-005	Bulldog	4796.06	95794.4	23640.8	2429.98	24655.4	507	33.8	8.4	6.8	559.3	22.1	118	14	218.5	4.3	67.3	117.6	12.31	39.7	5.92	0.99	4.47	0.7	4.44	0.82	2.42	0.37	2.54	0.38	23.6	1.95599	0.901272	-0.0433753
9	A	AP3-006	Bulldog	4136.61	97646.8	34761.8	2787.33	23991.2	323	36.9	10.3	8.6	122.6	20.9	114	15	171.3	12.2	46.1	85.6	8.87	29.5	4.69	0.77	3.53	0.59	3.53	0.66	2.11	0.31	2.13	0.33	18.2	1.59774	0.943826	-0.0507162
9	A	AP3-007	Bulldog	659.459	23710.4	28397	11149.3	1494.26	68	17.6	10.5	6.3	79.3	5	26	17	39.8	3.8	7.7	14.4	1.34	4.9	1.11	0.25	1.05	0.19	1.08	0.19	0.62	0.08	0.53	0.08	4.5	1.07251	0.978044	0.0368285
9	A	AP3-008	Bulldog	2697.79	57794.2	175977	27444.5	26315.7	363	6.2	71.4	20.8	288.9	15	117	82	99.2	13	33.9	69.6	8.41	33.4	6.48	1.29	6.42	0.98	5.44	1.07	2.85	0.41	2.53	0.38	33.2	0.989156	0.961798	-0.0275345
9	A	AP3-009	Bulldog	4016.7	76265.1	30845	14722.8	24074.3	487	6.4	3.9	3.9	259.8	19.4	76	8	213.4	4.6	41.4	77.5	8.21	27	4.59	0.84	3.56	0.62	3.72	0.73	2.3	0.34	2.23	0.33	20.5	1.37051	0.943025	-0.00977797
10	C	CP_4	Bulldog	4856.01	79652.3	18744.8	3287.62	3486.62	152	6	<1	2	146.5	6.65	292	6	236	0.4	10.7	17	1.73	6	1.01	0.19	1.08	0.14	0.9	0.2	0.73	0.13	0.93	0.12	6	0.84935	0.847343	-0.0703694
10	C	CP_5	Bulldog	479.606	5292.51	629.49	1072.05	581.103	27.1	8	<1	4	20	2	13	8	141	0.9	3.1	5	0.58	2.1	0.45	0.13	0.4	0.05	0.32	0.06	0.21	0.04	0.23	0.03	1.8	0.994992	0.826541	0.159046
10	L	LR_1	Finch	6774.44	51972.4	5735.35	1214.99	4233.75	163	12	9	15	44.9	8.58	88	7	266	0.8	9.8	17.6	2.08	7.5	1.36	0.32	1.32	0.23	1.66	0.38	1.23	0.23	1.47	0.27	10.5	0.492147	0.886017	0.04987
10	L	LR_2	Finch	5035.87	32231.4	4896.03	1786.75	2905.51	170	89	13	17	54.3	8.36	75	28	190	0.7	9.3	20.6	2.34	8.9	1.73	0.44	1.56	0.24	1.51	0.33	0.95	0.16	1.02	0.15	8.5	0.673083	1.03254	0.100507
10	L	LR_3	Finch	6474.69	41705	4126.65	1786.75	2739.49	210	79	13	18	57.3	8.42	105	14	345	1.1	7.9	18.1	2.11	7.6	1.61	0.36	1.42	0.26	1.85	0.46	1.44	0.24	1.57	0.26	12.6	0.371461	1.04534	0.0495297
10	M	M_1	Mintabie	4436.36	46097.8	3357.28	857.641	26979.8	1125	4	6	18	101	17.5	56	4	790	0.5	35.7	70.8	8.39	28.9	5.81	1.59	4.98	0.82	4.83	0.97	2.68	0.41	2.65	0.44	25.8	0.994508	0.946462	0.143587
10	M	M_3	Mintabie	1738.57	54777.5	3776.94	1072.05	35198.2	1310	4	8	27	181	5.23	22	9	204	0.5	20.7	47	5.44	18.5	3.41	1.2	2.19	0.34	1.8	0.33	0.85	0.15	0.89	0.14	8.6	1.71698	1.04207	0.311609
4	L	op1-S1	Finch	8356.21	87382.6	6764.06	1965.84	8329.49	227.11	50.89	11.38	22.99	63.76	11.81	112.83	54.42	170.27	6.3	11.79	16.45	1.89	7.34	1.58	0.257	1.14	0.185	2.06	0.386	1.68	0.254	1.66	0.286	10.57	0.524314	0.743556	-0.0461788
4	L	op3-S2	Finch	4507.5	67363.6	6195.49	1256.17	7682.21	93.44	94.29	12.46	12.67	27.45	2.77	117.66	42.44	103.68	3.59	3.36	7.51	0.871	7.07	0.469	0.108	0.374	0.034	0.387	0.114	0.445	0.088	0.42	0.088	2.65	0.590576	0.736181	0.0841729
4	L	op4-s3	Finch	6178.34	94778.3	5786.6	4414.73	4716.09	112.74	31.17	10.9	9.55	43.55	4.66	90.52	22.97	113.86	2.2	7.07	11.33	2.6	13.11	1.92	0.48	1.59	0.284	1.48	0.323	0.98	0.165	0.95	0.19	9.12	0.549391	0.564169	0.111797
4	L	op5-S4	Finch	5257.99	26624.4	4409.56	2297.41	10304.9	70.26	34.02	10.69	18.38	20.85	2.2	116.57	29.22	58.32	3.1	1.34	5.81	0.342	1.07	0.273	0.077	0.22	0.0312	0.56	0.082	0.358	0.059	0.41	0.063	2.56	0.241272	2.15266	0.170022
4	L	op5-S5	Finch	7991.68	53622.7	3593.75	1962.3	8137.7	152.94	19.76	4.75	10.37	38.52	4.52	92.54	15.9	161.84	1.66	3.28	5.89	0.72	3.31	0.49	0.145	0.48	0.097	0.77	0.18	0.55	0.112	0.93	0.112	5.24	0.260361	0.824096	0.147276
4	L	op8-S6	Finch	7072.91	94617.9	5474.49	1121.93	6816.22	164.89	22.73	7.74	23.99	34.97	5.67	120.94	29.85	168.6	4.33	12.97	25.67	3.55	18.31	2.29	0.36	1.34	0.26	1.39	0.352	1.26	0.155	1.42	0.173	9.47	0.674275	0.793538	-0.0212924
4	L	op8-S7	Finch	32761.5	110581	6364.28	1271.16	7354.32	193.47	22.34	6.42	24.88	47.09	9.43	154.8	33.9	311.52	5.01	12.67	18.19	3.2	12.52	2.18	0.452	1.82	0.267	2.02	0.452	1.46	0.199	1.48	0.243	11.47	0.631976	0.663863	0.0287884
4	L	op8-S8	Finch	6774.79	102529	5999.16	1016.9	7590.4	160.64	30.23	5.66	29.93	39.6	5.99	136.19	65.63	132.06	10.44	9.36	14.78	2.14	9.45	1.23	<0.28	<0.96	0.201	<0.75	0.61	1.27	0.185	1.86	0.105	9.13	0.371491	0.724539
4	L	op9-S9	Finch	649.53	11055.4	981.08	1331.27	1444.75	40.72	37.8	10.66	8.46	24.5	6.63	12.83	27.07	139.48	16.38	12.26	35.38	4.07	15.79	3.17	0.93	2.59	0.364	2.07	0.387	0.98	0.135	0.87	0.112	9.02	1.0403	1.20381	0.184179
4	L	op9-S10	Finch	6444.3	105489	8672.62	1488.99	6567.13	149.33	53.57	19.16	15.11	49.97	8.35	112.75	47.14	132.12	6.56	6.7	10.66	1.94	7.56	1.42	0.366	1.57	0.254	1.64	0.375	0.98	0.237	1.49	0.226	11.58	0.331951	0.700179	0.0582042
3	L	D clay	Argillite	5425.01	75442.6		1438.99	1169.24	97.401	14.2083	6.3058	29.2137	22.5614	8.02987	129.893	11.6318	189.53	1.38322	8.42056	15.4176		6.74859	1.31406	0.280391	1.37971		1.95996		1.37153		1.53053	0.247514	8.80517	0.40615	0.907997	-0.0112285
3	L	K clay	Argillite	4404.93	85082.7		845.225	962.569	91.7186	19.249	19.4997	96.675	28.3833	3.90328	93.8643	9.89835	111.331	0.891504	6.27452	9.76349		5.71565	1.20866	0.279409	1.33335		1.58685		1.19379		1.2288	0.196486	12.0257	0.376952	0.740217	0.0114992
3	L	N clay	Argillite	4074.28	87913.4		1469.42	962.75	89.5376	31.0072	6.4743	38.7333	35.7034	5.78491	172.677	13.3427	125.041	1.99233	5.86854	10.7239		4.46945	0.798985	0.17049	0.815386		1.20121		0.914347		1.0139	0.16397	8.04296	0.427289	0.920453	-0.0043988
3	L	3 clay	Argillite	8692.29	128234		2580.07	6899.6	177.256	24.9208	13.1887	8.37563	73.0396	13.0253	249.914	14.4543	286.877	1.03937	14.0342	26.5516		11.284	2.0221	0.469531	2.13167		2.81432		2.20462		2.57121	0.399549	21.2645	0.402937	0.937289	0.0245143
3	L	GE clay	Argillite	6473.4	141479		1244.86	5223.71	138.442	13.0904	8.74621	8.12702	42.2386	5.76885	180.124	9.9143	165.422	1.23046	9.32671	14.9068		8.64222	1.74391	0.459847	1.79068		2.63114		1.75491		1.68836	0.315947	17.8419	0.407801	0.755896	0.0860622
3	L	S Clay	Argillite	6110.76	151389		2379.95	5340.07	146.499	18.889	8.91217	10.7398	54.338	8.25897	292.147	11.1463	185.309	2.46814	8.88429	16.2222		6.54238	1.32617	0.234195	1.32344		1.84751		1.21864		1.45503	0.232199	11.9704	0.450752	0.928972	-0.0812757
3	L	6 clay	Argillite	8372.45	119124		2425.21	6069.86	176.059	16.7363	7.96008	11.1952	55.9733	9.50373	212.175	11.3514	332.048	2.13619	11.5987	21.6552		8.60882	1.62346	0.33443	1.88993		2.42686		1.7688		2.14243	0.327541	17.1478	0.399658	0.94768	-0.0519931
3	L	D Sand	Arenite	4928.43	69405.2		1112.61	899.574	83.263	12.2923	5.10327	35.4239	14.9817	7.59578	146.467	9.89452	200.261	2.08676	7.14384	13.6182		5.70843	1.08451	0.201069	0.973401		1.19034		0.856347		0.968496	0.16002	5.24272	0.544527	0.946231	-0.0357433
3	L	K Sand	Arenite	4695.93	53350.6		834.336	763.247	107.367	14.0546	4.45108	35.7306	26.6483	5.533	107.06	10.6217	185.444	1.6983	5.77235	10.6635		4.08015	0.709765	0.13005	0.701574		0.836125		0.666908		0.81453	0.142428	5.90594	0.523156	0.951054	-0.0630124
3	L	N Sand	Arenite	4042.2030l3	65189.8		1045.59	757.233	79.4708	9.16992	4.20024	36.9704	25.5223	6.21768	118.382	8.9254	159.255	0.784233	6.5601	12.8745		5.05103	0.917845	0.166479	0.783028		0.925175		0.693235		0.795579	0.131009	6.17846	0.608713	0.985299	-0.0340112
3	L	3 Sand	Arenite	7531.06	116264		1874.61	5032.65	138.745	15.9566	7.19932	11.9797	44.5402	11.3676	261.354	10.0126	280.07l3596	1.22444	10.0632	20.0606		8.32468	1.83907	0.274767	1.44557		1.65772		1.24132		1.42214	0.216323	10.9623	0.522375	0.978791	-0.100675
3	L	GE Sand	Arenite	9644.62	128375		1913.99	5806.26	220.77	19.6774	8.91113	14.0348	54.3653	10.2577	271.441	10.2244	388.421	2.60616	11.0886	20.731		8.49404	1.4827	0.293989	1.47633		1.73408		1.39573		1.64985	0.264378	12.196	0.496156	0.940083	-0.0304472
3	L	6 Sand	Arenite	9345.44	113932		1903.83	5731.91	161.226	8.95598	5.77866	11.6394	42.7318	10.5025	252.95	8.19664	396.912	2.97176	8.34984	15.8963		6.47733	1.15435	0.278483	1.3684		1.95291		1.52965		2.007	0.303939	14.2899	0.307126	0.953634	0.012015
3	L	Conglomerate	Silcrete	7296.72	3235.17		927.441	290.481	740.036	10.2878	8.27884	6.817	35.1914	3.37452	140.83	27.7212	863.256	0.632258	3.10208	4.85626		2.34679	0.658787	0.177253	0.768228		1.46747		1.67918		2.09213	0.416891	11.438	0.109459	0.79013	0.0635602
3	L	Fine grain	Silcrete	4884.71	32172.7		1492.42	2029.55	319.289	9.14345	16.8198	7.7575	75.6829	3.39075	127.682	23.1997	224.951	0.749536	9.45442	16.0701		6.94417	1.2153	0.258137	1.30734		1.70212		1.14537		1.20952	0.206205	10.9286	0.577043	0.865426	-0.0190937
4	L	CM3	Clay	7913.51	86426.7	6364.84	1214.99	3154.56	161	16	7	11.1	53	8.4	95	12	341	1.8	9	14													13
4	L	CM4	Wallangulla Ss	9652.08	111407	6574.67	786.171	3071.54	163	11	5	9.9	38	7.3	122	11	247	2.1	7	14													9
4	L	CM5	Finch	5575.42	124744	5315.69	1072.05	2988.53
4	L	CM6	Finch	5995.08	127126	7064.27	1357.93	3071.54	111	24	6	8.1	53	6.5	101	13	216	0.8	8	14													11
4	L	CM7		6834.39	80922.5	9372.4	1357.93	3237.57	153	24	5	11.7	53	10.1	142	10	337	2.8	9	15													12
4	L	GF2	Blow	6714.49	89972.7	4336.48	8219.06	2407.43	382	20	9	8.5	60	6.5	80	10	227	1.6	7	9													10
4	L	GF3	Finch	4915.97	113366	11121	1429.4	2905.51	87	15	5	7.9	49	8.1	228	15	179	5.5	5	8													8
4	L	GF4	Blow	5635.38	99075.8	6434.78	1357.93	3652.65	111	21	5	7	54	7.4	102	13	201	2.3	5	13													10
4	L	L1	Wallangulla Ss	8393.11	90554.8	5105.86	3287.62	3320.59	133	14	6	10.6	55	7.4	125	11	218	2.9	6	13													9
4	L	L2	Finch	7853.55	95000.6	7763.71	4788.5	5977.06	167	21	6	10.3	88	9	119	16	230	2.6	9	16													15
4	L	L3	Finch	5875.18	124639	14688.1	3716.45	3237.57	114	38	10	8.6	74	7.8	176	20	181	3.4	4	10													10
4	L	L4	Wallangulla Ss	6174.93	99181.6	6155.01	4931.44	3403.6	118	18	5	7.1	74	7.5	98	13	224	1.9	7	11													10
4	L	MF5	worm hole	5035.87	55624.3	3427.22	1572.34	5645
4	L	S6	Finch	7733.65	91772.1	11610.6	1357.93	6475.15	301	25	11	16.1	56	7.8	122	19	268	2.3	11	24													16
4	L	S7	Wallangulla Ss	6354.78	79493.5	5735.35	1143.52	3486.62	109	50	20	11.5	40	6.2	82	13	180	2.1	6	8													8
4	L	TMR1	Finch	5275.67	105586	13499.1	3001.74	3901.69	115	20	6	8	87	7.9	131	23	189	0.8	10	16													10
4	L	TMR2	Steel band	4915.97	38211.9	5315.69	1786.75	2739.49	190	41	5	19.8	67	7.6	80	15	213	2.7	9	18													9
4	L	TMR3	Wallangulla Ss	5935.13	92407.2	8323.25	1000.58	3403.6	114	11	6	12.7	42	7.3	157	18	177	0.4	7	11													6
2	H	9656044	2mT			5970		1400	539					6.74		15.4	314	14.3	9.78	23		12.9	2.84	0.65		0.43		0.67			1.96	0.31		0.368357	0.846721	0.0522464
2	H	9656044	3mT			260			146					2.07			221		2.53	18.9		6.44	1.09	0.25		0.22		0.37			1.31	0.22		0.142572	2.16602	-0.0162684
2	H	9656046	4mT			590			128					6.15		21.5	425	1.17	5.86	10.6		7.12	1.6	0.41		0.39		0.65			2.3	0.38		0.188086	0.671318	-0.0184251
2	H	9656047	5mKss			660		2900	173					9.13		79.3	375	3.95	10.9	12.2		12	1.86	0.39		0.31		0.51			1.61	0.26		0.499789	0.507608	-0.00800153
2	H	9656048	6mKss			690		2400	145					6.18		33.2	269	3.25	5.79	9.73		5.52	0.94	0.22		-0.2		0.29			0.95	0.15		0.449926	0.776085
2	H	9656049	7mKss			520		1300	125					6.74		30.6	229	2.59	6.54	12.2		12	1.86	0.39		0.31		0.51			1.61	0.26		0.299873	0.678627	-0.00800153
2	H	9656050	8mKss			800		3500	122					7.31		21.5	268	3.21	8.7	25.8		8.78	1.61	0.33		0.28		0.5			1.73	0.31		0.371244	1.30416	-0.0280256
2	H	9656051	9mKss			810		2700	114					6.7		20.6	247	3.01	6	14		6.44	1.08	0.21		0.23		0.39			1.19	0.2		0.372212	1.03717	-0.101921
2	H	9656052	10mKss			350		1600	148					5.89		26.7	287	1.34	8.7	25.8		8.78	1.61	0.33		-0.2		0.5			1.73	0.31		0.371244	1.30416
2	H	9656053	11mKss			380		2300	155					7.91		31.1	292	1.42	4.97	9.43		4.91	0.89	0.16		-0.2		0.29			1.07	0.18		0.342893	0.845049
2	H	9656054	12mKss			600		2600	114					7.42		31.3	231	1.52	5.88	12.6		6.16	1.13	0.24		0.21		0.32			1.16	0.2		0.374201	0.928474	-0.0288043
2	H	9656055	13m Kcl			1110		2900	117					8.04		32.1	228	2.11	7.06	14.5		7.38	1.31	0.29		0.13		0.37			1.4	0.25		0.372274	0.902278	0.123629
2	H	9656056	14m Kss			810		2500	116					7.68		32	267	2.11	7.01	27.5		8.07	1.4	0.28		0.22		0.38			1.26	0.22		0.410708	1.67364	-0.0147973
2	H	9656057	15m Kzst			1130		2100	161					9.19		30.6	237	3.17	6.81	16.8		7.77	1.3	0.28		0.23		0.37			1.36	0.24		0.369653	1.07175	-0.0106506
2	H	9656058	16m Kss			440		1800	116					7.91		18	284	1.13	6.5	14.1		7.4	1.28	0.29		0.22		0.39			1.38	0.24		0.347712	0.93075	0.018308
2	H	9656059	17m Kss			830		3800	117					9.44		43.6	289	1.66	6.91	14.4		6.88	1.32	0.27		0.23		0.37			1.3	0.21		0.392392	0.905099	-0.0293801
2	H	9656060	18m Kcl			1550		3000	155					11.6		41.9	317	2.13	9.65	24.2		11.4	1.86	0.34		0.26		0.41			1.71	0.3		0.416598	1.08531	-0.0276713
2	H	9656061	19m Kcl			1230		4400	87.3					10.5		47.5	304	1.61	8.55	16.7		8.97	1.71	0.34		0.23		0.44			1.53	0.24		0.412535	0.832809	0.0171391
2	H	9656062	20m Kcl			710		1800	158					9.59		41.5	254	1.22	8.96	16.9		8.26	1.6	0.3		0.22		0.38			1.33	0.22		0.497327	0.840951	-0.0130677
2	H	9656063	21m Kss			1180		2700	209					18		45.7	273	2.57	8.42	19.5		9.02	1.41	0.28		0.25		0.39			1.49	0.25		0.417169	1.05761	-0.0464503
2	H	upper clay		6354.54	129241	7695.3	1572.33	3569.65	135.06	17	7	2	68.04	10	226	16	257		7.06	14.5		7.38	1.31	0.29				0.37			1.4	0.25	24	0.372274	1.47844	0.357026
2	H	lower clay		6054.79	106483	15779.2	2358.49	4150.76	149.32	23	4	7	81.4	5	171	18	250		9.053	19.267		9.543	1.723	0.327				0.41			1.523	0.253	21	0.438812	1.53202	0.290162
2	H	sandstone		6294.59	122731	4275.17	1072.04	1577.29	124	16	9	8	53.11	7	75	14	211		6.71	16.605		7.021	1.254	0.262				0.377			1.295	0.222	24	0.382506	1.78139	0.331903
