# Supplementary material
Source: publisher figshare collection journal article supplement (https://tandf.figshare.com/articles/dataset/_/7886456)
Supplement: Supplementary file 1 [file 1 › taje_a_1572032_sm2138.pdf]

## **Which water formed Australian sediment-hosted precious and potch opal?**

B. L. Dickson

47 Amiens St, Gladesville, NSW 2111, Australia

e-mail: [bldickson47@gmail.com](mailto:bldickson47@gmail.com)

### **SUPPLEMENTARY PAPERS**

*Australian Journal of Earth Sciences* (2019) 66,

<https://doi.org/10.1080/08120099.2019.1572032>

---

Copies of Supplementary Papers may be obtained from the Geological Society of Australia's website ([www.gsa.org.au](http://www.gsa.org.au)), the Australian Journal of Earth Sciences website ([www.ajes.com.au](http://www.ajes.com.au)) or from the National Library of Australia's Pandora archive (<https://pandora.nla.gov.au/tep/150555>).

---

### **Supplementary paper**

All data used in this study apart from a large data collection from Baudet *et al.* (2018), which is available via that publication (excel spreadsheet).
